# Supplementary material for: Unnatural spirocyclic oxindole alkaloids biosynthesis in Uncaria guianensis
Source: PubMed Central journal article supplement (PMC6683290; doi:10.1038/s41598-019-47706-3), 2019-08-05
Supplement: 41598_2019_47706_MOESM1_ESM.pdf [file 41598_2019_47706_MOESM1_ESM.pdf]

## Electronic Supporting Information for:

### **Unnatural spirocyclic oxindole alkaloids biosynthesis in *Uncaria guianensis***

**Adriana A. Lopes<sup>1\*</sup>, Bianca Chioca<sup>1†</sup>, Bruno Musquiari<sup>1†</sup>, Eduardo J. Crevelin<sup>2</sup>, Suzelei de C. França<sup>1</sup>, Maria Fatima das G. Fernandes da Silva<sup>3</sup> and Ana Maria S. Pereira<sup>1</sup>**

<sup>1</sup>Unidade de Biotecnologia, Universidade de Ribeirão Preto (UNAERP), Av. Costábile Romano, 2201, 14096-900, Ribeirão Preto, SP, Brazil.

<sup>2</sup>Faculdade de Filosofia, Ciências e Letras de Ribeirão Preto, Universidade de São Paulo (USP), Av. do Café s/n 14040-900, Ribeirão Preto, SP, Brazil.

<sup>3</sup>Centro de Ciências Exatas e de Tecnologia, Departamento de Química, Universidade Federal de São Carlos (UFSCar), Rod. Washington Luis s/n, 13565-905, São Carlos, SP, Brazil.

Correspondence and requests for materials should be addressed to A.A.L. (\*e-mail: [alopes@unaerp.br](mailto:alopes@unaerp.br))

natural oxindole alkaloids

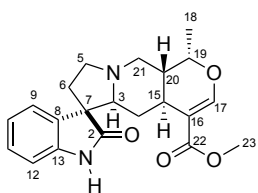

mitraphylline (1)

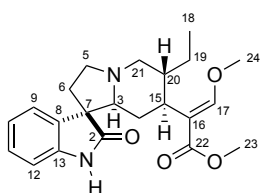

rhynchophylline (2)

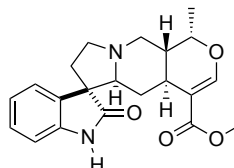

isomitraphylline (3)

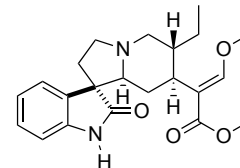

isorhynchophylline (4)

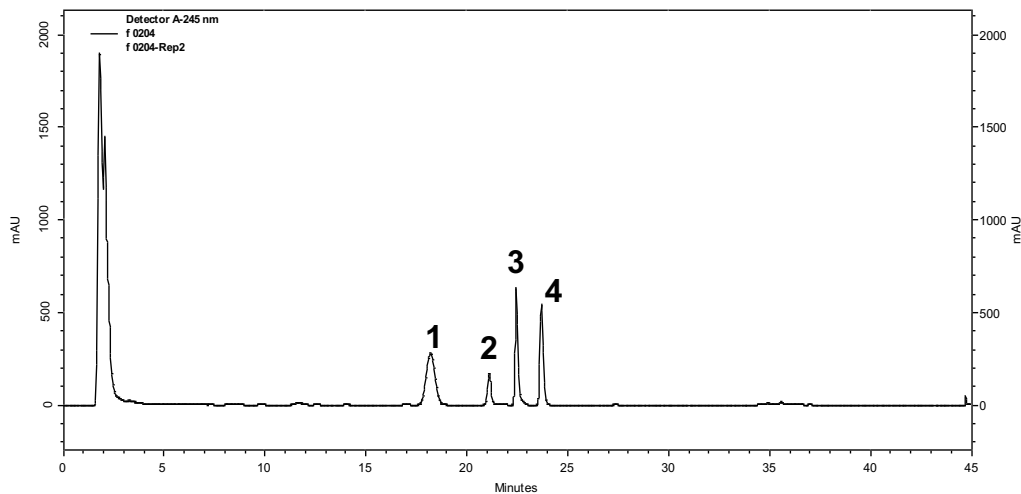

**Figure S1.** Chromatogram of methanolic extract from aerial parts of *U. guianensis* using HPLC conditions described in methods section.

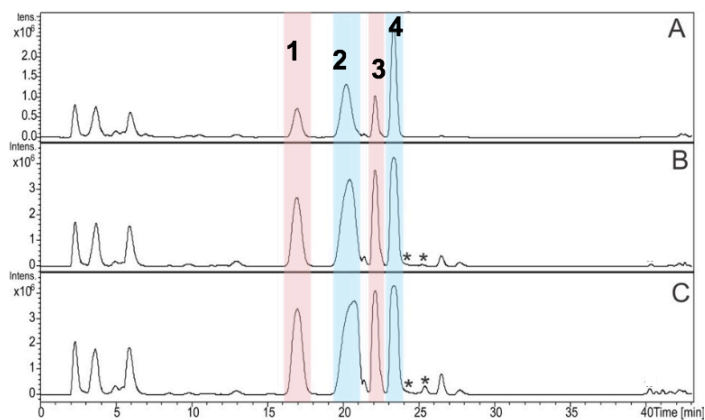

**Figure S2.** Chromatogram of control extract (A) and extracts obtained after supplementation with **a**-5-methyl-tryptamine (B) and **b**-7-methyl-tryptamine (C), an asterisk is used to represent unnatural oxindole alkaloids biosynthesis.

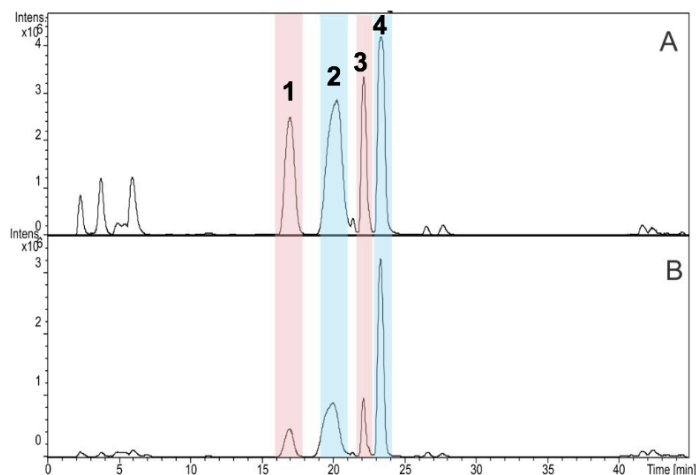

**Figure S3.** Chromatogram of control extract (A) and extracts obtained after supplementation with *c*-6-fluoro-tryptamine (B), the unnatural oxindole alkaloids co-eluted with natural oxindole alkaloids (1-4).

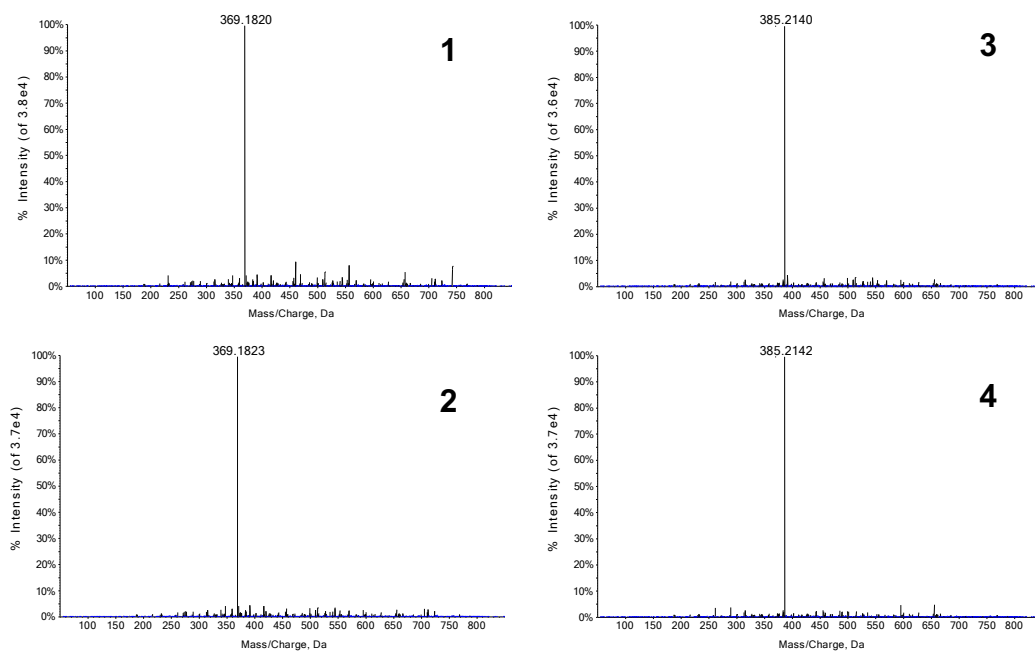

**Figure S4.** ESI-QTOF-MS/MS of natural oxindole alkaloids (1-4).

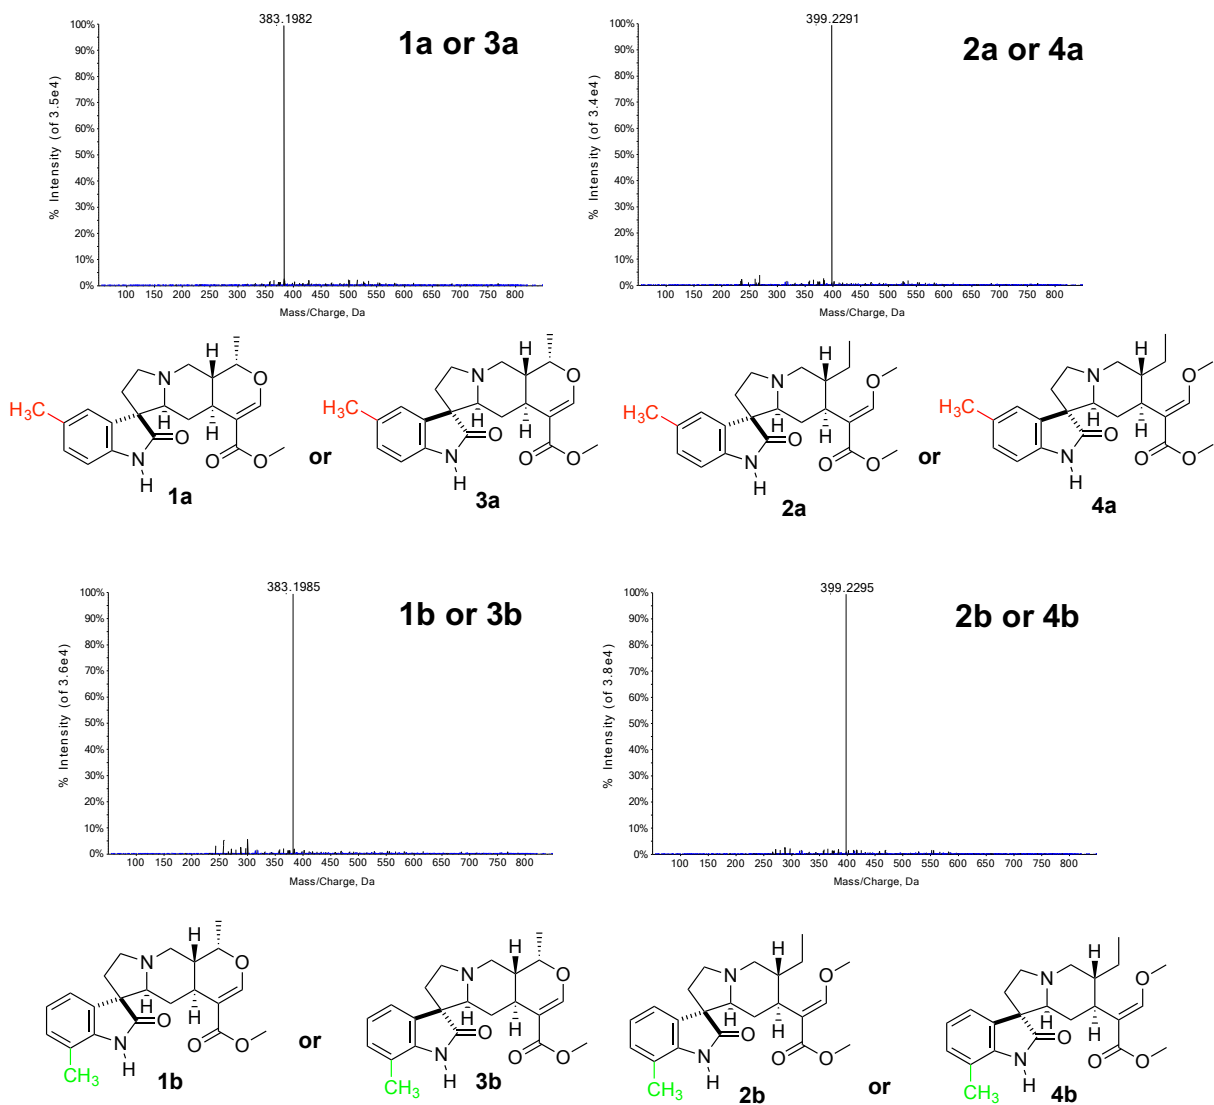

**Figure S5.** ESI-QTOF-MS/MS of methylated oxindole alkaloids produced by *U. guianensis* plantlets.

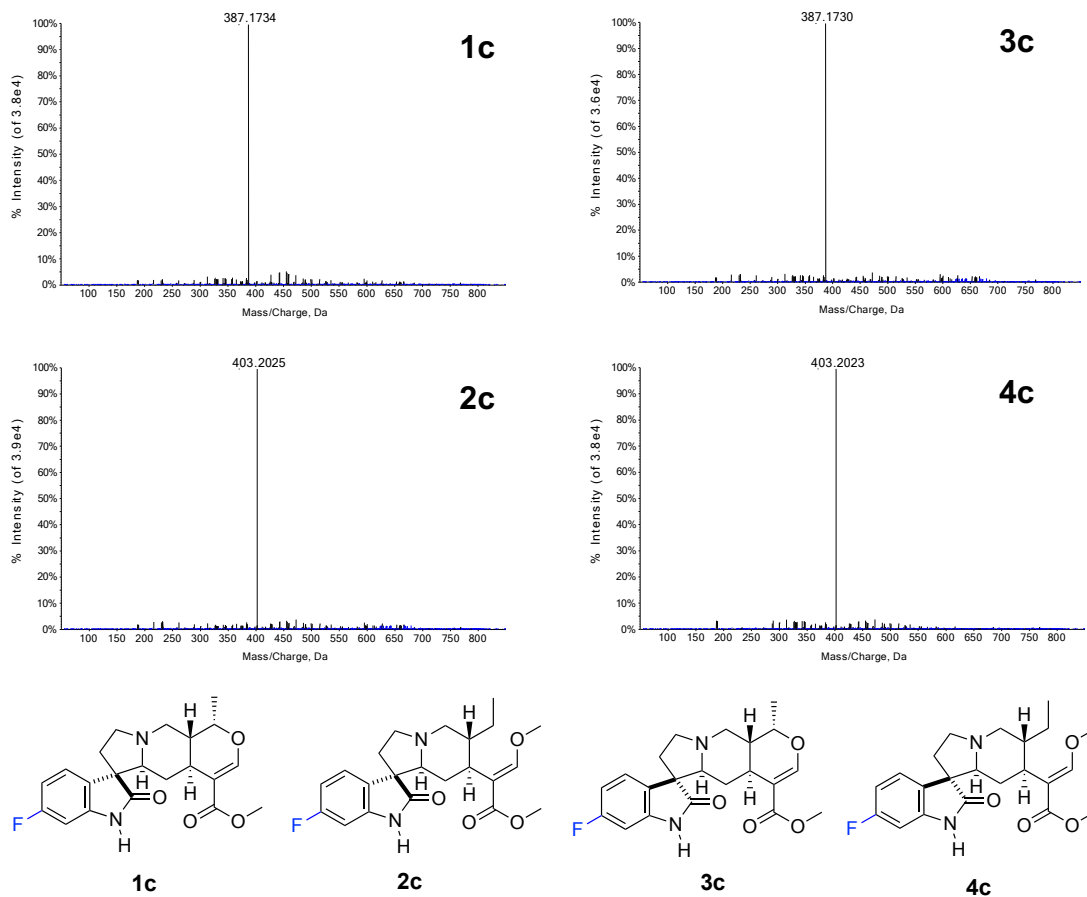

**Figure S6.** ESI-QTOF-MS/MS of fluorated oxindole alkaloids produced by *U. guianensis* plantlets.

**Table S1.** ESI-QToF-MS data of compounds.

| <b>Compounds</b>                                                    | <b>Observed<br/><i>m/z</i></b> | <b>Calculated<br/><i>m/z</i></b> | <b>error<br/>(ppm)</b> | <b>Molecular Formula</b>                                                         |
|---------------------------------------------------------------------|--------------------------------|----------------------------------|------------------------|----------------------------------------------------------------------------------|
| mitraphylline ( <b>1</b> )                                          | 369.1820                       | 369.1814                         | 1.6                    | [C <sub>21</sub> H <sub>24</sub> N <sub>2</sub> O <sub>4</sub> +H] <sup>+</sup>  |
| isomitraphylline ( <b>3</b> )                                       | 369.1823                       | 369.1814                         | 2.4                    | [C <sub>21</sub> H <sub>24</sub> N <sub>2</sub> O <sub>4</sub> +H] <sup>+</sup>  |
| rinchophylline ( <b>2</b> )                                         | 385.2140                       | 385.2127                         | 3.4                    | [C <sub>22</sub> H <sub>23</sub> N <sub>2</sub> O <sub>4</sub> +H] <sup>+</sup>  |
| isorinchophylline ( <b>4</b> )                                      | 385.2142                       | 385.2127                         | 3.9                    | [C <sub>22</sub> H <sub>23</sub> N <sub>2</sub> O <sub>4</sub> +H] <sup>+</sup>  |
| 5-methyl-mitraphylline/5-methyl-isomitraphylline ( <b>1a/3a</b> )   | 383.1982                       | 383.1970                         | 3.1                    | [C <sub>22</sub> H <sub>26</sub> N <sub>2</sub> O <sub>4</sub> +H] <sup>+</sup>  |
| 5-methyl-rinchophylline/5-methyl-isorinchophylline ( <b>2a/3a</b> ) | 399.2291                       | 399.2284                         | 1.8                    | [C <sub>23</sub> H <sub>30</sub> N <sub>2</sub> O <sub>4</sub> +H] <sup>+</sup>  |
| 7-methyl-mitraphylline/7-methyl-isomitraphylline ( <b>1b/3b</b> )   | 383.1985                       | 383.1970                         | 3.9                    | [C <sub>22</sub> H <sub>26</sub> N <sub>2</sub> O <sub>4</sub> +H] <sup>+</sup>  |
| 7-methyl-rinchophylline/7-methyl-isorinchophylline ( <b>2b/3b</b> ) | 399.2295                       | 399.2284                         | 2.8                    | [C <sub>23</sub> H <sub>30</sub> N <sub>2</sub> O <sub>4</sub> +H] <sup>+</sup>  |
| 6-fluor-mitraphylline ( <b>1c</b> )                                 | 387.1734                       | 387.1720                         | 3.6                    | [C <sub>21</sub> H <sub>23</sub> FN <sub>2</sub> O <sub>4</sub> +H] <sup>+</sup> |
| 6-fluor-isomitraphylline ( <b>3c</b> )                              | 387.1730                       | 387.1720                         | 2.6                    | [C <sub>21</sub> H <sub>23</sub> FN <sub>2</sub> O <sub>4</sub> +H] <sup>+</sup> |
| 6-fluor-rinchophylline ( <b>2c</b> )                                | 403.2025                       | 403.2033                         | -2.0                   | [C <sub>22</sub> H <sub>27</sub> FN <sub>2</sub> O <sub>4</sub> +H] <sup>+</sup> |
| 6-fluor-isorinchophylline ( <b>4c</b> )                             | 403.2023                       | 403.2033                         | -2.5                   | [C <sub>22</sub> H <sub>27</sub> FN <sub>2</sub> O <sub>4</sub> +H] <sup>+</sup> |

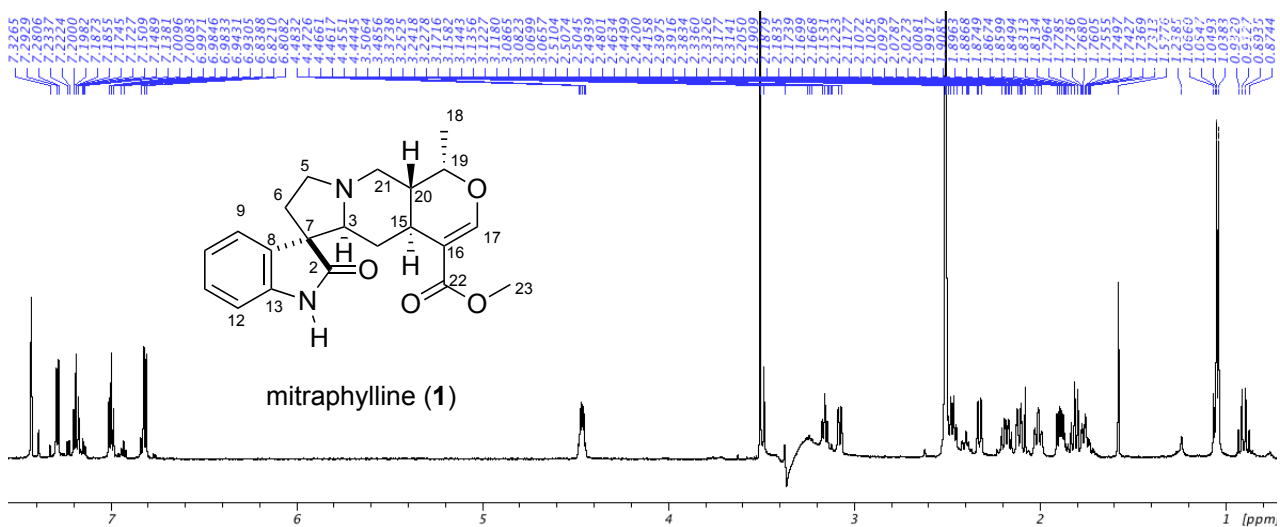

Figure S7.  $^1\text{H-NMR}$  spectrum of **1** (600 MHz,  $\text{DMSO-d}_6$ ).

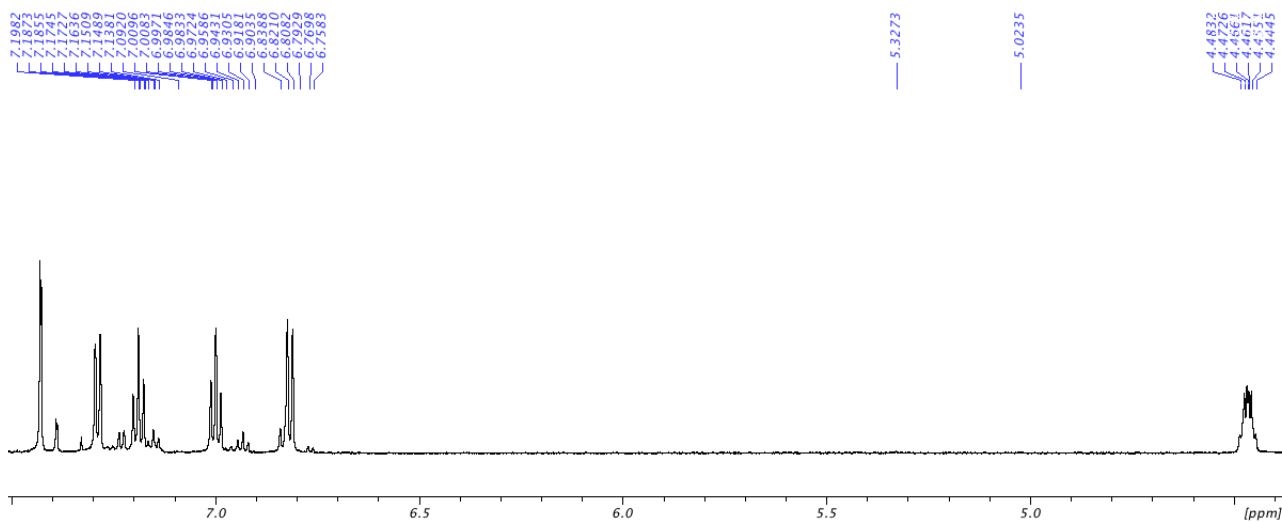

Figure S8.  $^1\text{H-NMR}$  spectrum (expanded view) of **1** (600 MHz,  $\text{DMSO-d}_6$ ).

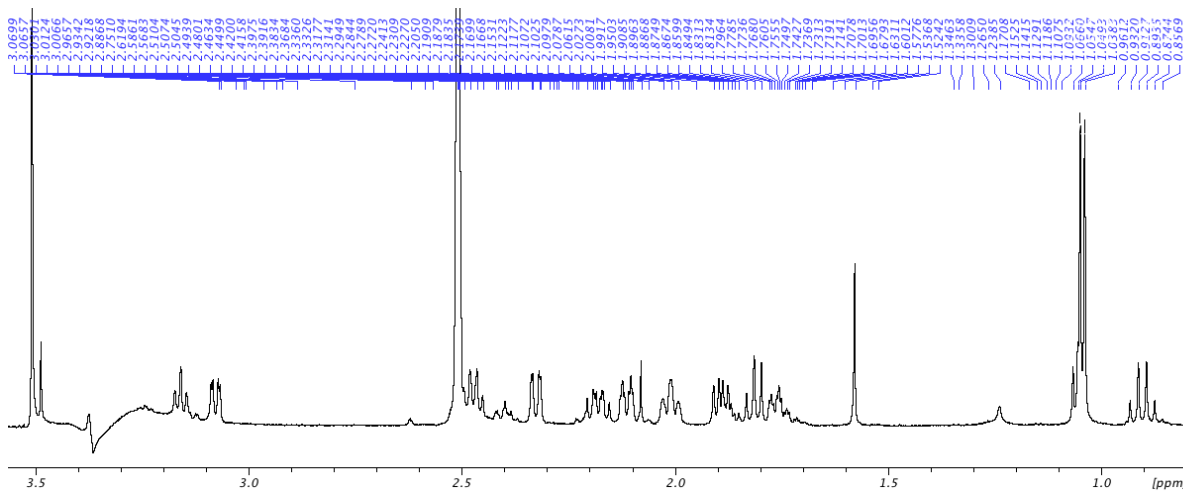

Figure S9.  $^1\text{H-NMR}$  spectrum (expanded view) of **1** (600 MHz,  $\text{DMSO-d}_6$ ).

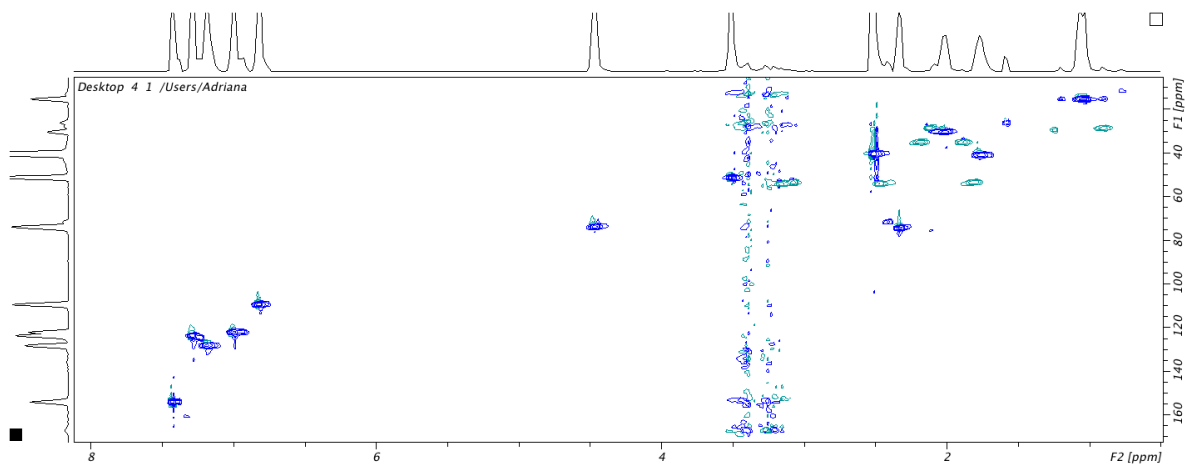

**Figure S10.** HSQC spectrum of **1** in DMSO-d<sub>6</sub> (600 MHz).

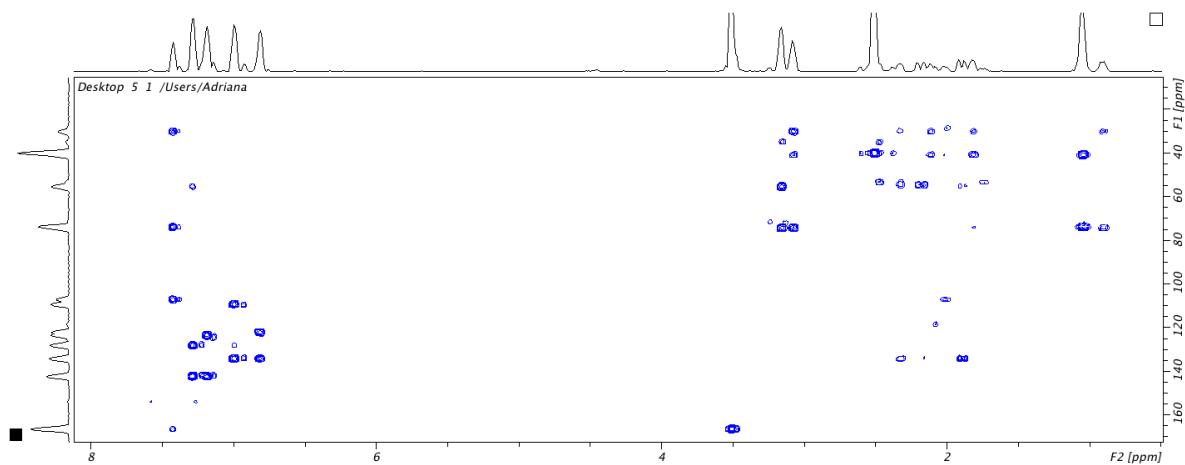

**Figure S11.** HMBC spectrum of **1** in DMSO-d<sub>6</sub> (600 MHz).

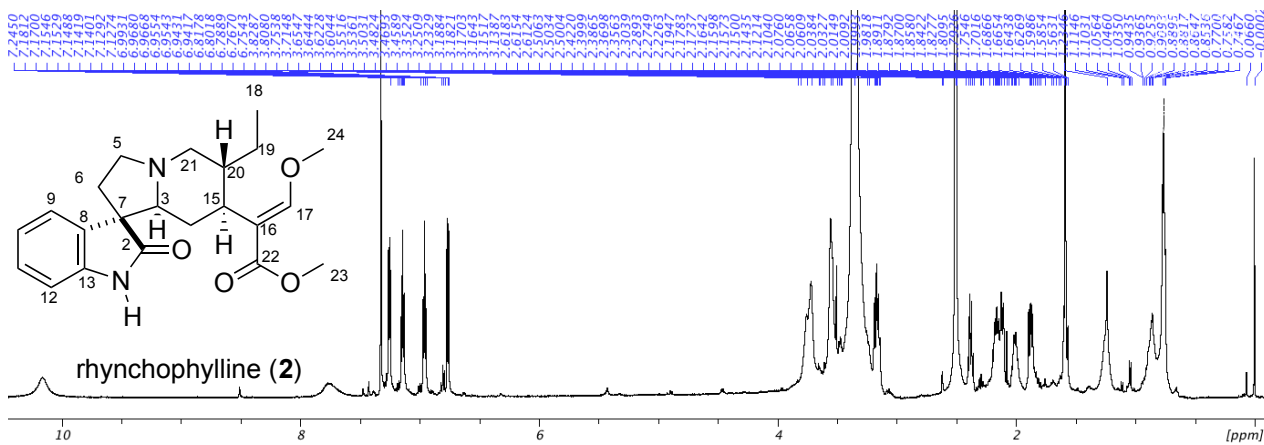

**Figure S12.** <sup>1</sup>H-NMR spectrum of **2** (600 MHz, DMSO-d<sub>6</sub>).



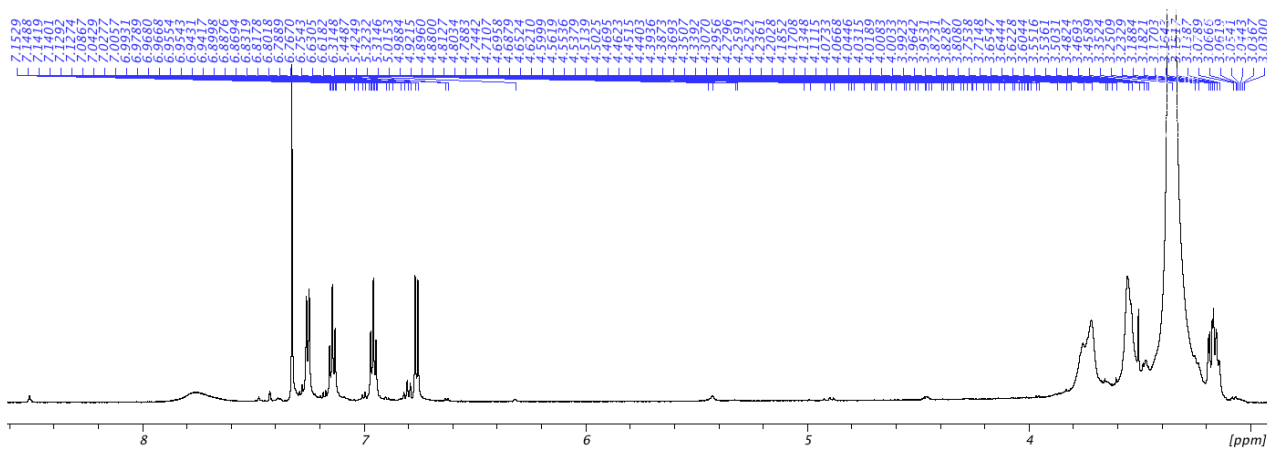

**Figure S13.**  $^1\text{H-NMR}$  spectrum (expanded view) of **2** (600 MHz,  $\text{DMSO-d}_6$ ).

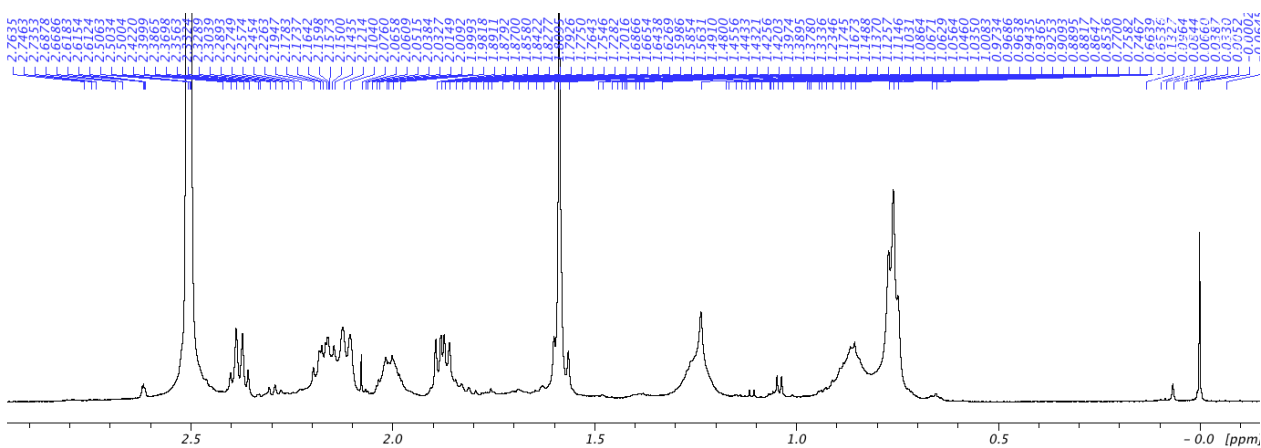

**Figure S14.**  $^1\text{H-NMR}$  spectrum (expanded view) of **2** (600 MHz,  $\text{DMSO-d}_6$ ).

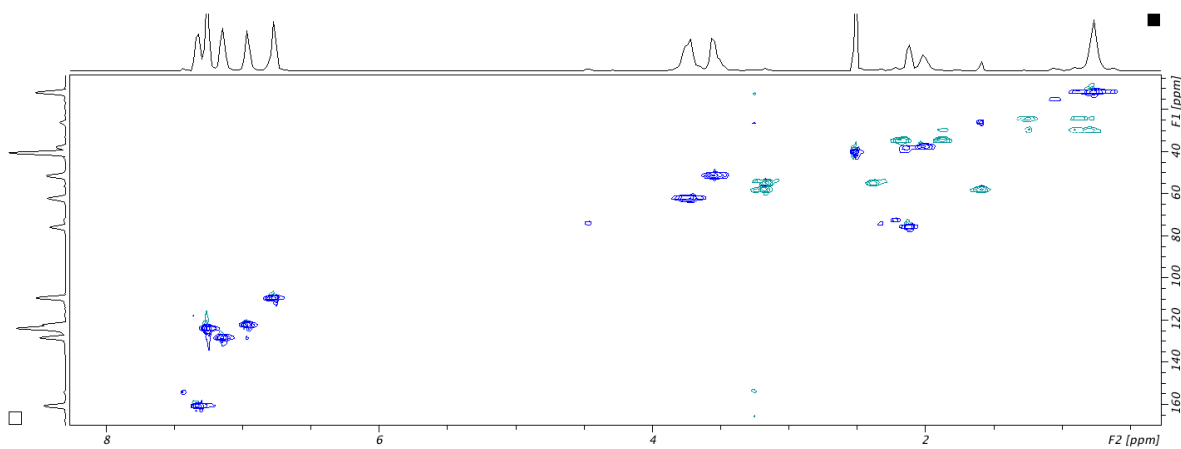

**Figure S15.** HSQC spectrum of **2** in  $\text{DMSO-d}_6$  (600 MHz).

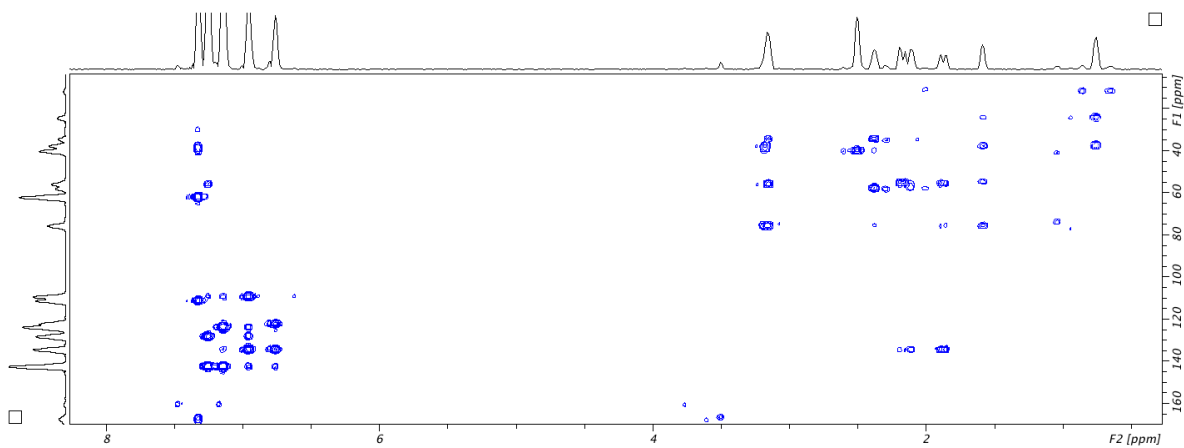

**Figure S16.** HMBC spectrum of **2** in DMSO- $d_6$  (600 MHz).

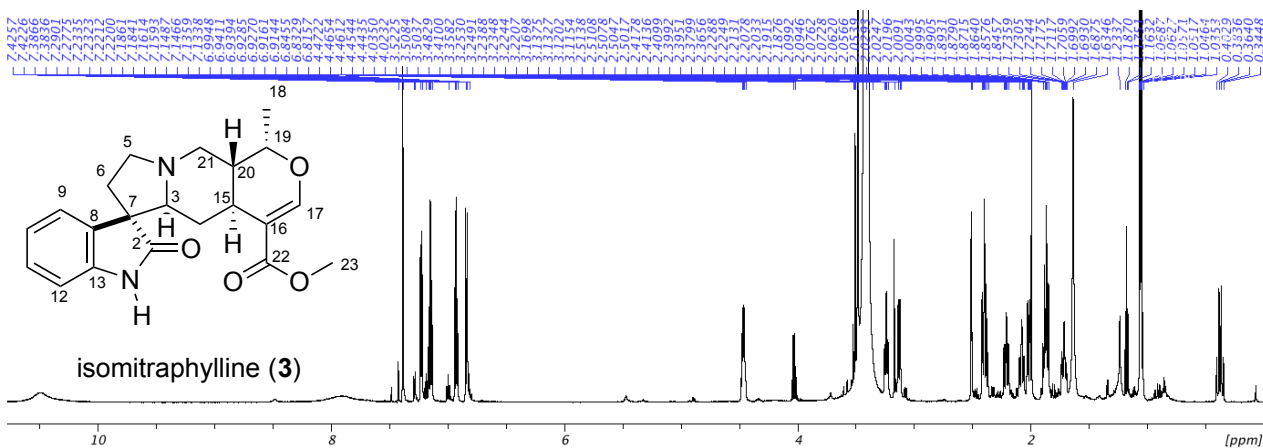

**Figure S17.**  $^1\text{H}$ -NMR spectrum of **3** (600 MHz, DMSO- $d_6$ ).

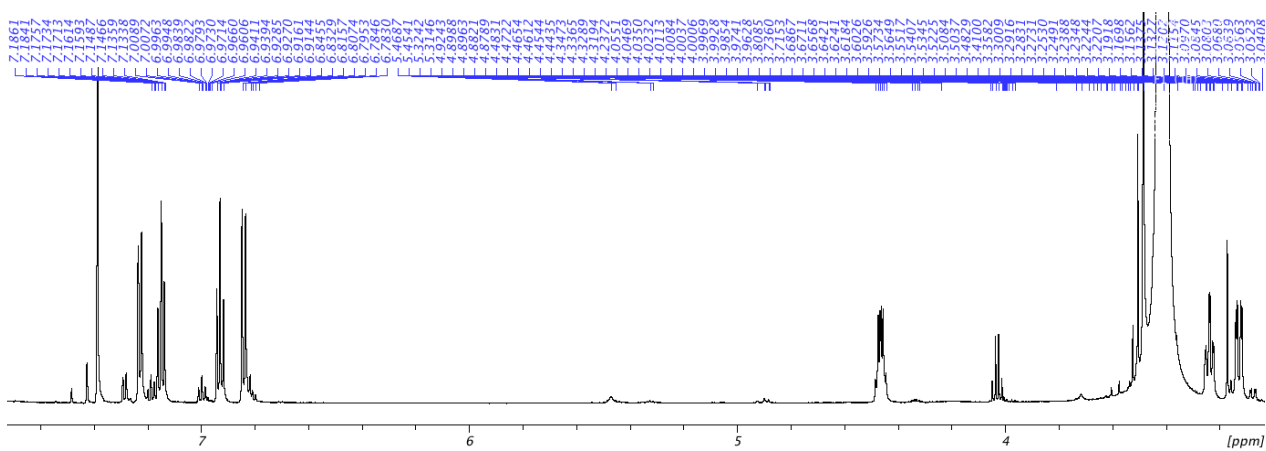

**Figure S18.**  $^1\text{H}$ -NMR spectrum (expanded view) of **3** (600 MHz, DMSO- $d_6$ ).

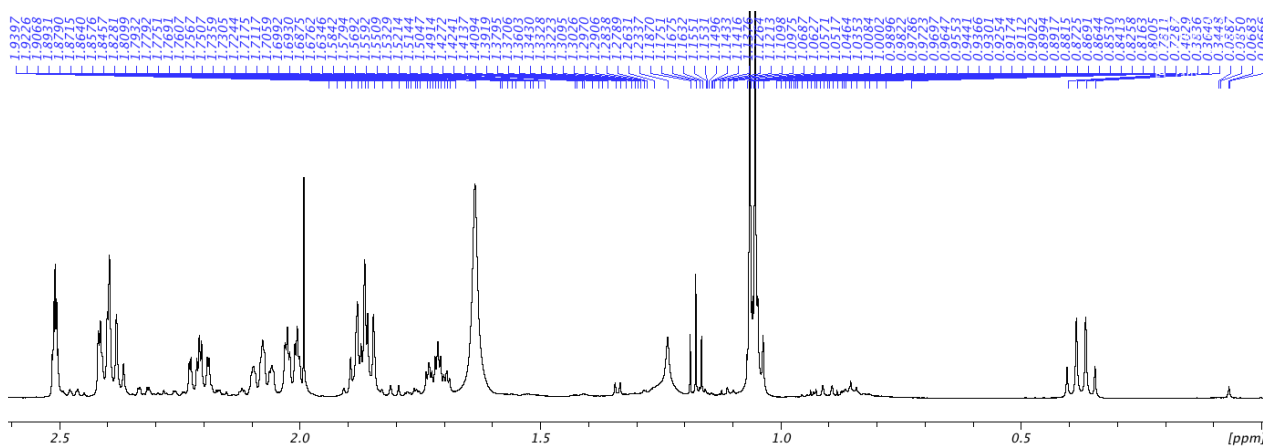

**Figure S19.** <sup>1</sup>H-NMR spectrum (expanded view) of **3** (600 MHz, DMSO-d<sub>6</sub>).

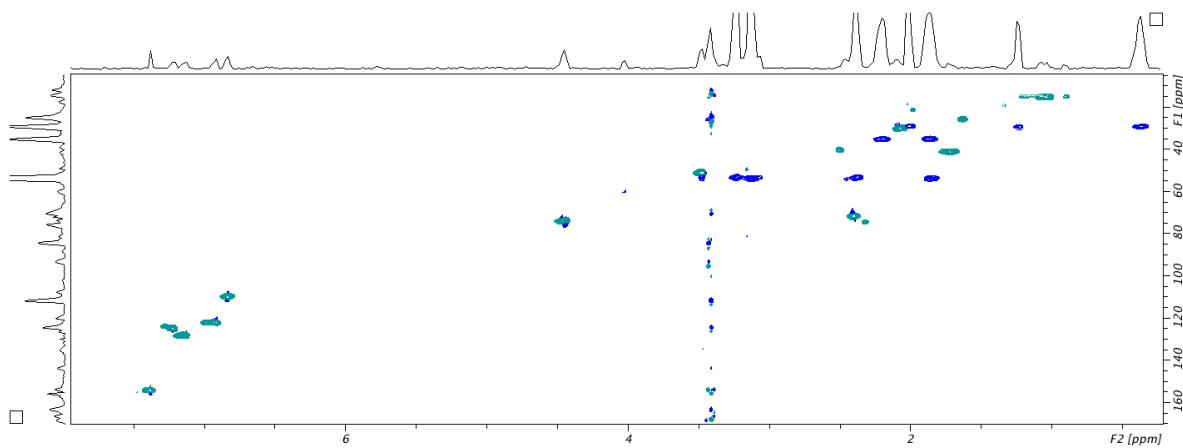

**Figure S20.** HSQC spectrum of **3** in DMSO-d<sub>6</sub> (600 MHz).

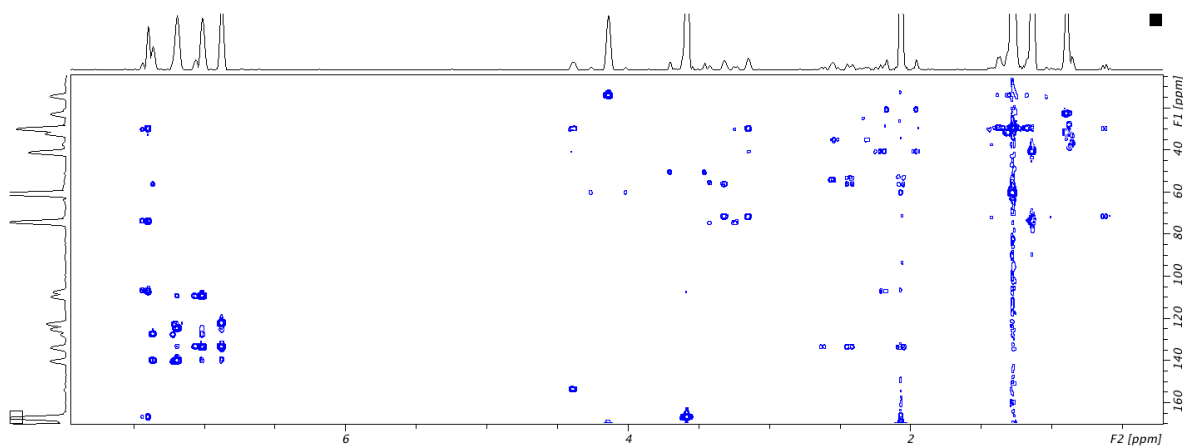

**Figure S21.** HMBC spectrum of **3** in DMSO-d<sub>6</sub> (600 MHz).

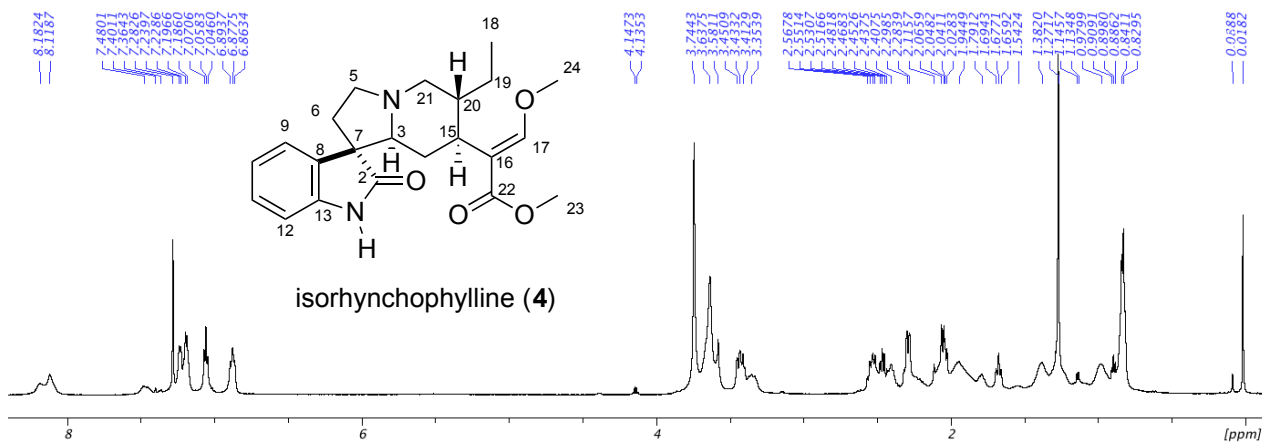

Figure S22. <sup>1</sup>H-NMR spectrum of 4 (600 MHz, DMSO-d<sub>6</sub>).

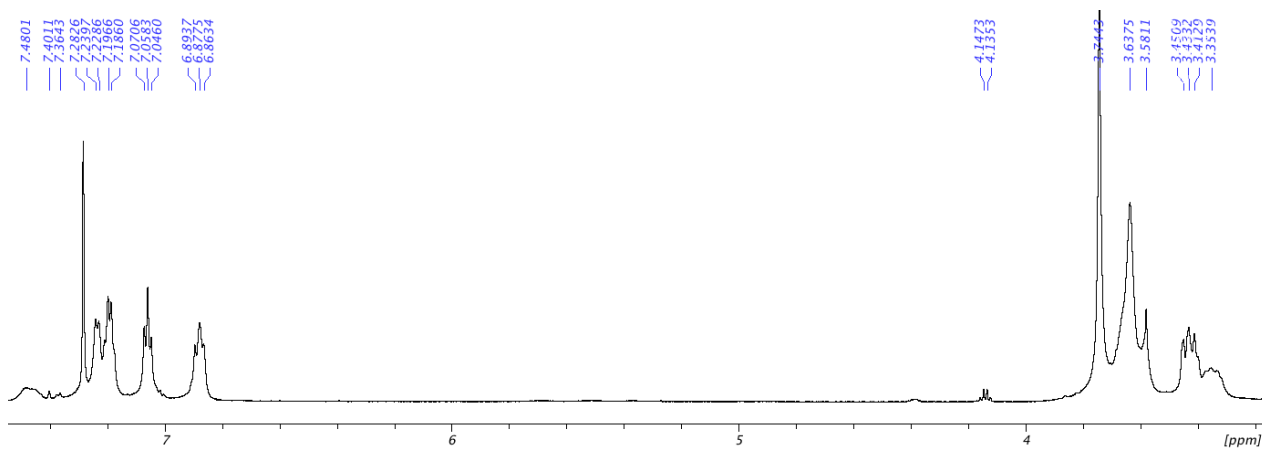

Figure S23. <sup>1</sup>H-NMR spectrum (expanded view) of 4 (600 MHz, DMSO-d<sub>6</sub>).

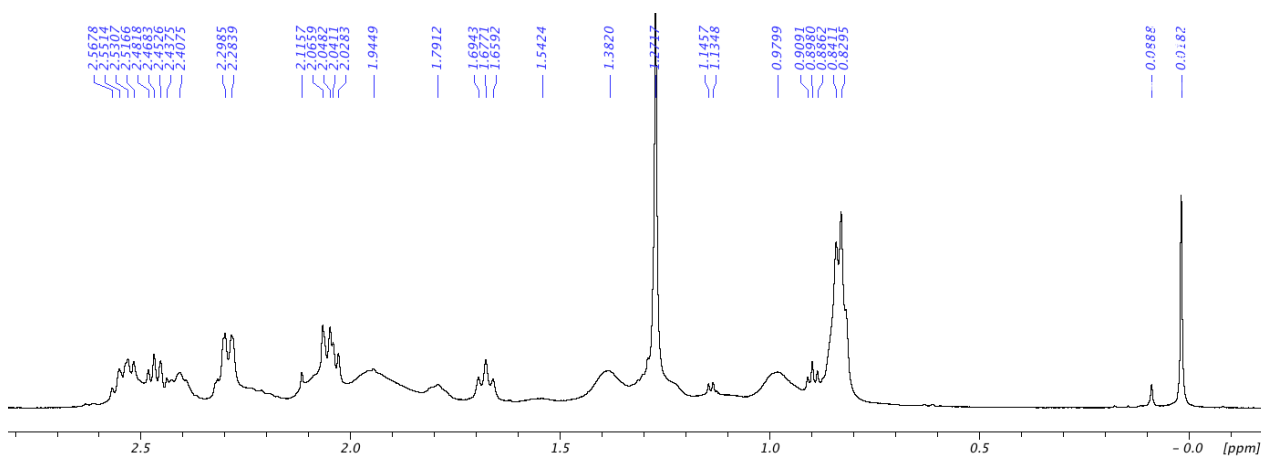

Figure S24. <sup>1</sup>H-NMR spectrum (expanded view) of 4 (600 MHz, DMSO-d<sub>6</sub>).

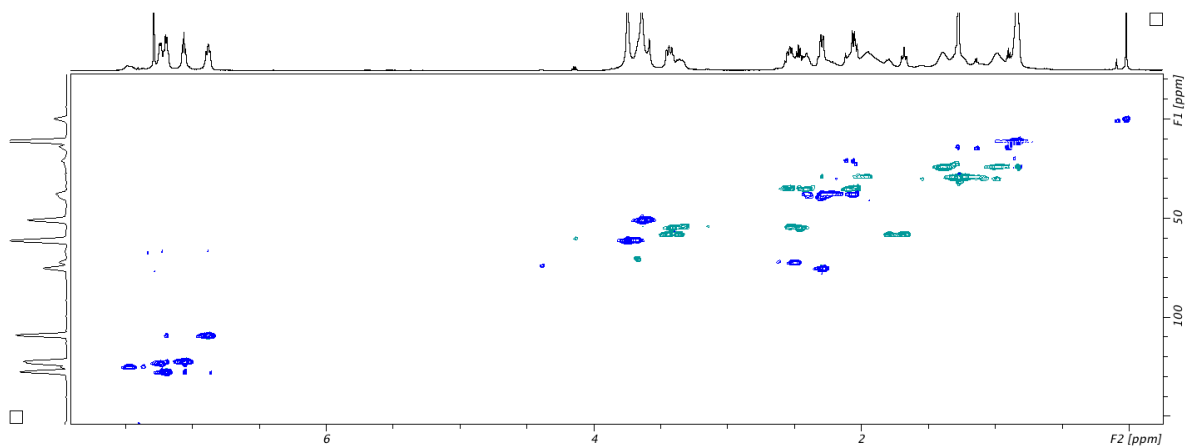

**Figure S25.** HSQC spectrum of **4** in DMSO-d<sub>6</sub> (600 MHz).

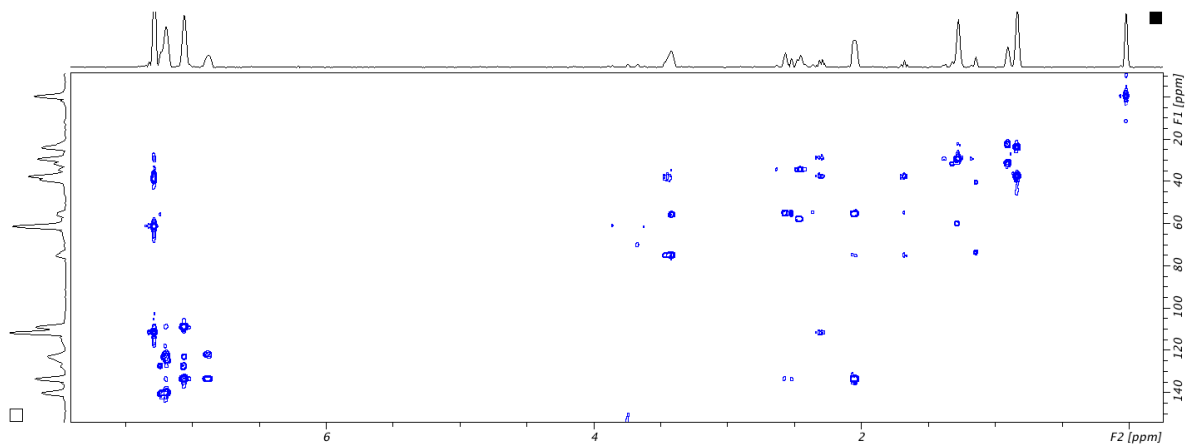

**Figure S26.** HMBC spectrum of **4** in DMSO-d<sub>6</sub> (600 MHz).

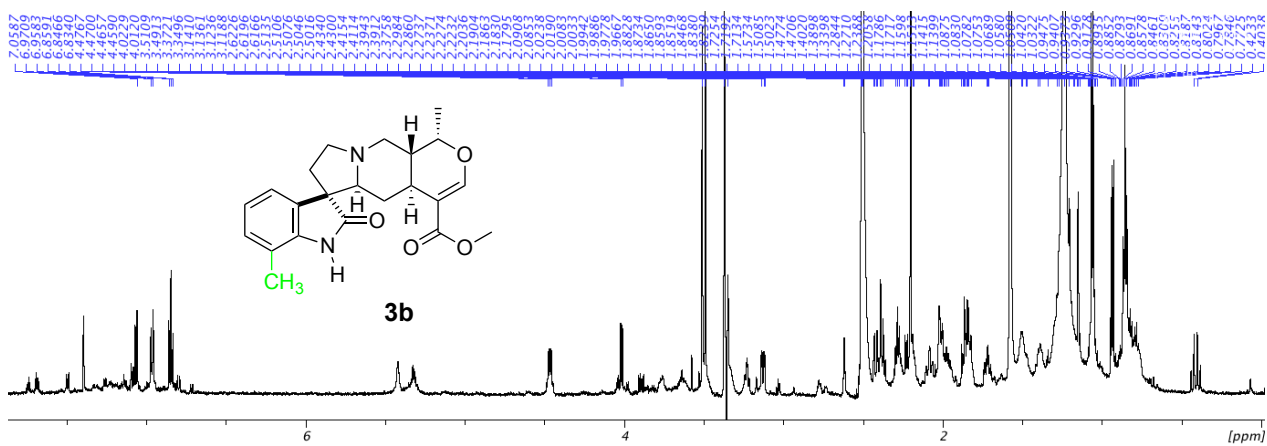

Figure S27.  $^1\text{H-NMR}$  spectrum of **3b** (600 MHz,  $\text{DMSO-d}_6$ ).

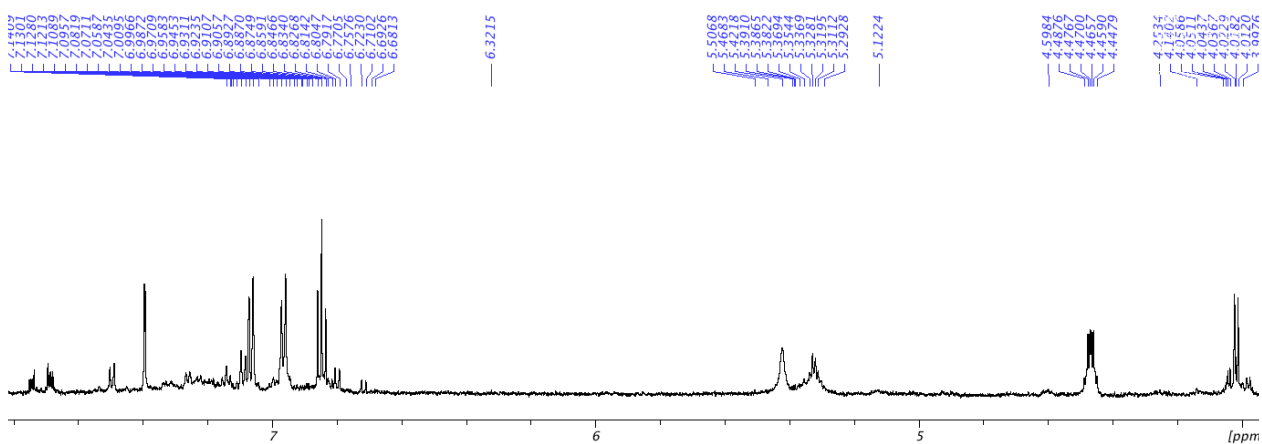

Figure S28.  $^1\text{H-NMR}$  spectrum (expanded view) of **3b** (600 MHz,  $\text{DMSO-d}_6$ ).

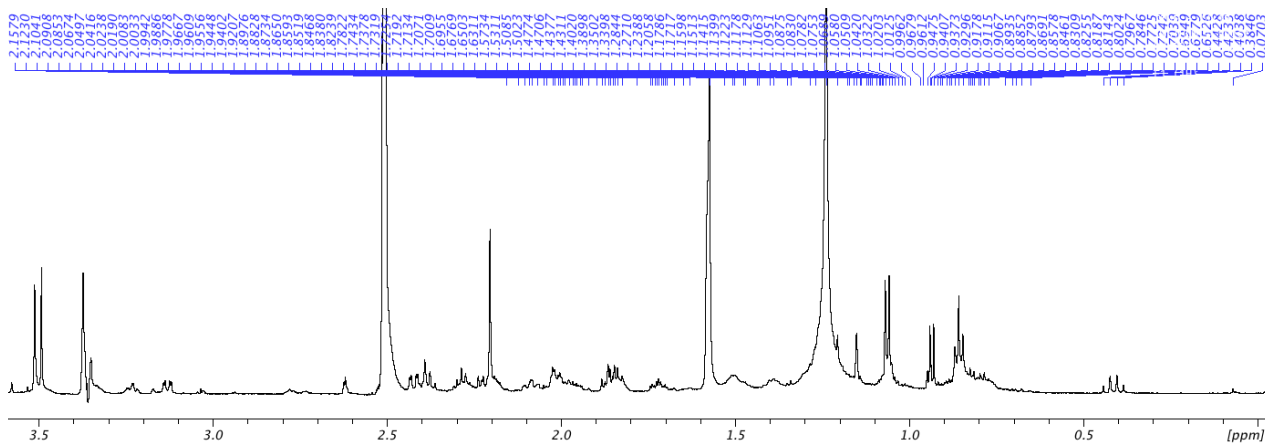

Figure S29.  $^1\text{H-NMR}$  spectrum (expanded view) of **3b** (600 MHz,  $\text{DMSO-d}_6$ ).

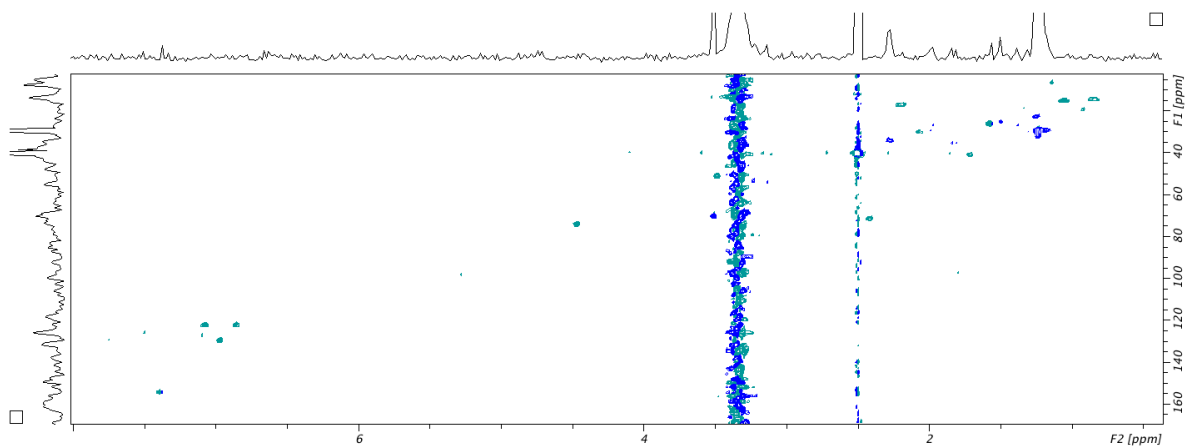

**Figure S30.** HSQC spectrum of **3b** in DMSO- $d_6$  (600 MHz).

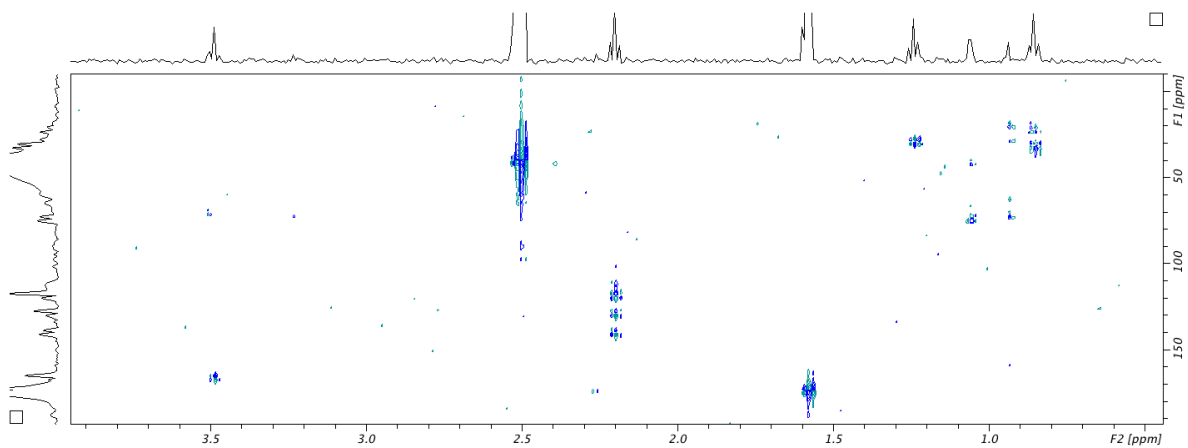

**Figure S31.** HMBC spectrum of **3b** in DMSO- $d_6$  (600 MHz).

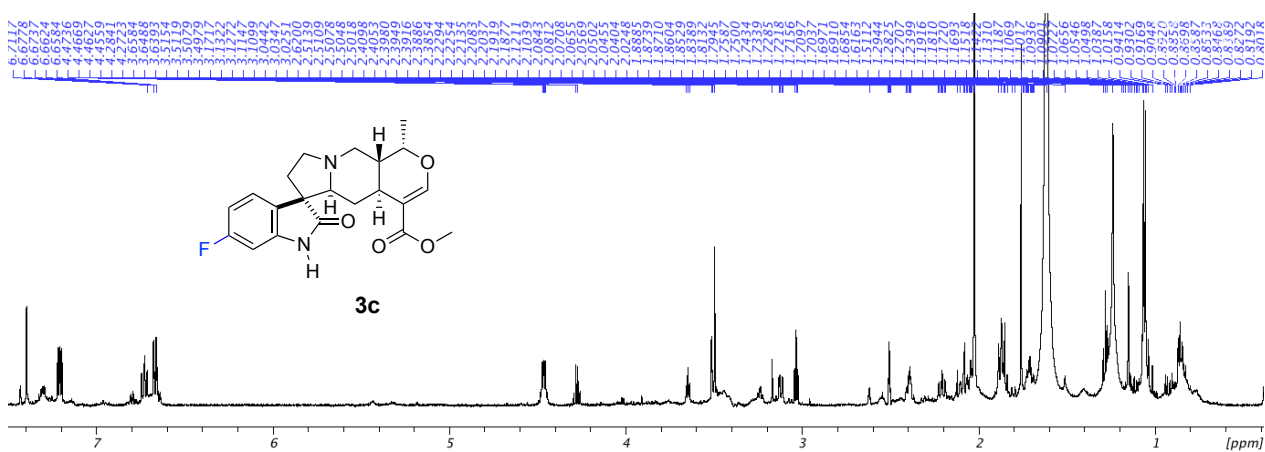

**Figure S32.**  $^1\text{H}$ -NMR spectrum of **3c** (600 MHz, DMSO- $d_6$ ).

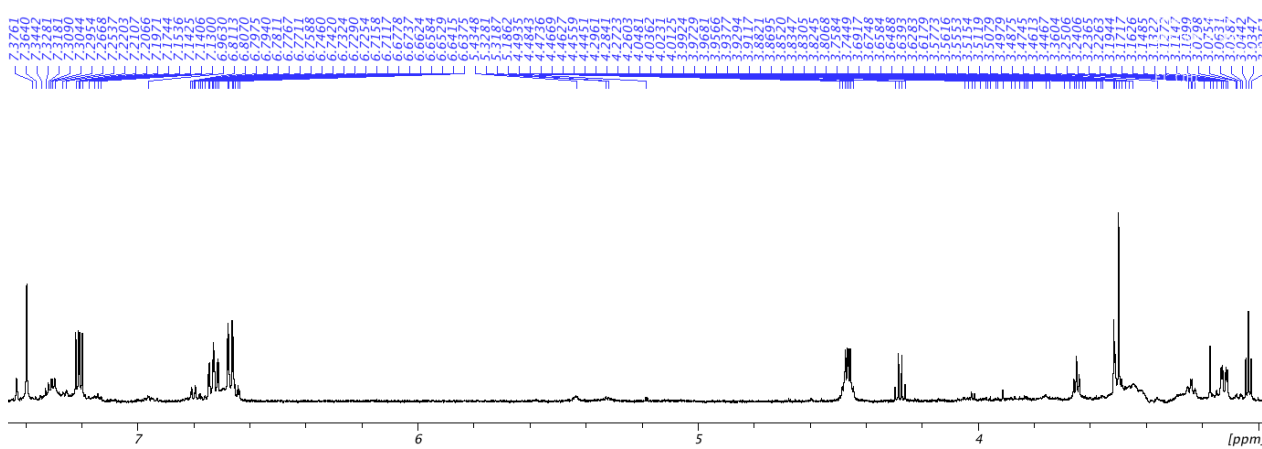

**Figure S33.**  $^1\text{H}$ -NMR spectrum (expanded view) of **3c** (600 MHz,  $\text{DMSO-d}_6$ ).

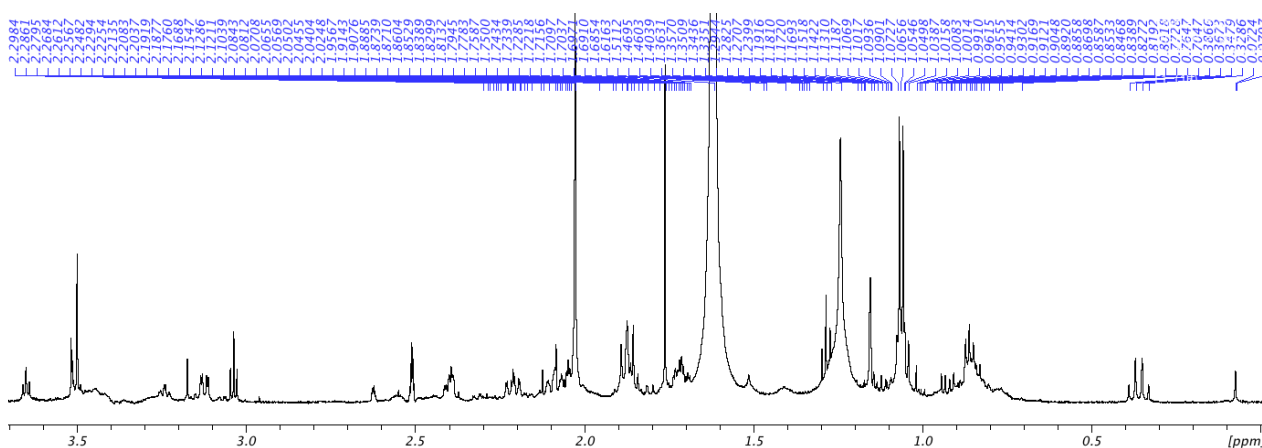

**Figure S34.**  $^1\text{H}$ -NMR spectrum (expanded view) of **3c** (600 MHz,  $\text{DMSO-d}_6$ ).

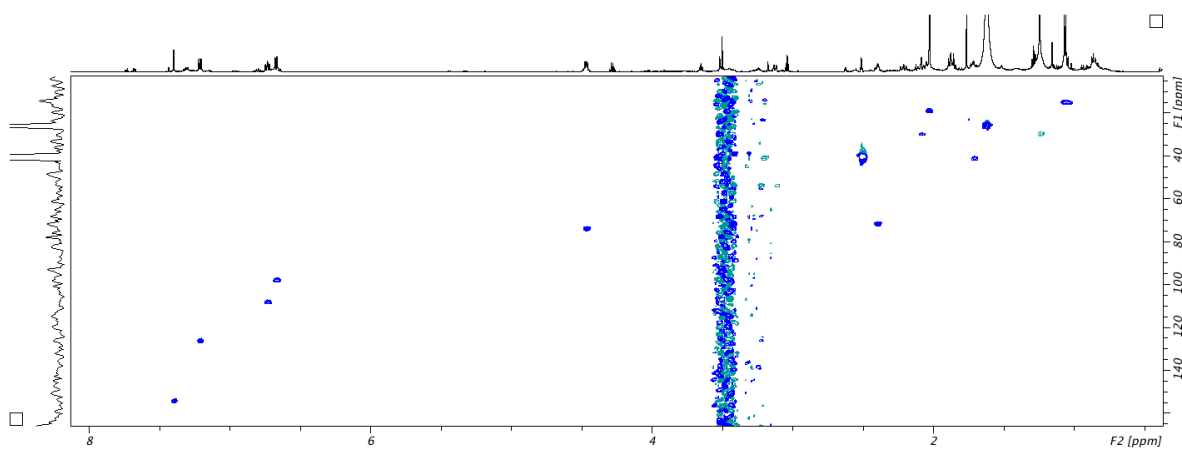

**Figure S35.** HSQC spectrum of **3c** in  $\text{DMSO-d}_6$  (600 MHz).



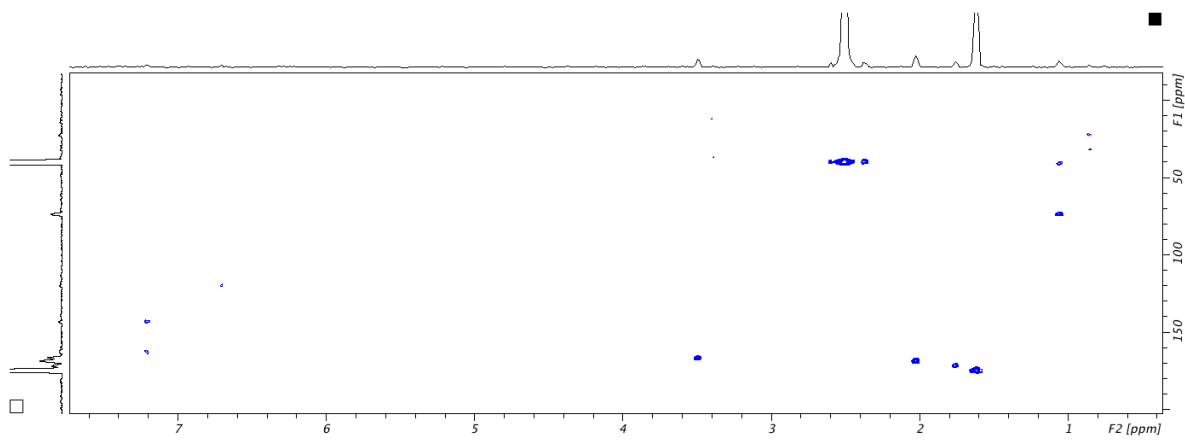

**Figure S36.** HMBC spectrum of **3c** in DMSO- $d_6$  (600 MHz).

**Table S2.**  $^1\text{H}$  and  $^{13}\text{C}$  NMR data for isomitrephylline (**3**), 7-methyl-isomitrephylline (**3b**) and 6-fluoro-isomitrephylline (**3c**) (600 MHz; DMSO- $d_6$ )

|           | <b>3<sup>1</sup></b>                               |                        | <b>3b</b>                 |           | <b>3c</b>                                         |           |
|-----------|----------------------------------------------------|------------------------|---------------------------|-----------|---------------------------------------------------|-----------|
|           | RMN de $^1\text{H}$                                | RMN de $^{13}\text{C}$ | RMN de $^1\text{H}$       | gHMQC*    | RMN de $^1\text{H}$                               | gHMQC*    |
| <b>2</b>  | -                                                  | 181.6                  | -                         | <i>no</i> | -                                                 | <i>no</i> |
| <b>3</b>  | 2.50 m                                             | 71.6                   | 2.41 m                    | 71.8      | 2.39 m (1H)                                       | 71.8      |
| <b>5</b>  | 2.50 m; 3.19 t<br>(J=6,8 Hz)                       | 53.3                   | 3.2 m (2H)                | 53.5      | <i>no</i>                                         | <i>no</i> |
| <b>6</b>  | 2.0 m; 2.3 m                                       | 35.3                   | 2.28 m; 1.57 m<br>(2H)    | 34.1      | 1.85 m                                            | 35.3      |
| <b>7</b>  | -                                                  | 56.4                   | -                         | <i>no</i> | -                                                 | 58.0      |
| <b>8</b>  | -                                                  | 133.7                  | -                         | <i>no</i> | -                                                 | 129.3     |
| <b>9</b>  | 7.27 d (J=7.5 Hz)                                  | 124.7                  | 7.06 d (J= 7.5<br>Hz; 1H) | 122.1     | 7.21 dd (J=<br>8.4; <b>6.0</b> Hz;<br>1H)         | 126.4     |
| <b>10</b> | 6.90 ddd (J= 7.5;<br>7.6; 0.9 Hz)                  | 122.2                  | 6.8 t (J= 7.5 Hz;<br>1H)  | 122.1     | 6.72 ddd (J=<br><b>10.0</b> ; 7.8; 2.4<br>Hz; 1H) | 107.8     |
| <b>11</b> | 7.09 ddd (J= 7.6;<br>7.7; 1.3 Hz)                  | 127.4                  | 6.96 d (J= 7.5<br>Hz; 1H) | 129.3     | -                                                 | 162.6     |
| <b>12</b> | 6.81 d (J= 7.7 Hz)                                 | 109.6                  | -                         | 119.0     | 6.68 dd (J=<br><b>9.0</b> ; 2.4 Hz;<br>1H)        | 97.9      |
| <b>13</b> | -                                                  | 140.3                  | -                         | 140.0     | -                                                 | 142.0     |
| <b>14</b> | 0.54 q (J=11.6 Hz),<br>2.5 m                       | 29.1                   | 0.93 m                    | 19.4      | 0.36 q (J=11.6<br>Hz; 1H), 2.03<br>m              | 29.2      |
| <b>15</b> | 1.80 m; 2.10 m                                     | 29.9                   | 2.07 m (1H)               | 30.7      | 2.07 m (1H)                                       | 30.0      |
| <b>16</b> | -                                                  | 107.2                  | -                         | <i>no</i> | -                                                 | 108.0     |
| <b>17</b> | 7.31 d (J=1.4 Hz)                                  | 153.7                  | 7.39 d (J= 1.5<br>Hz, 1H) | 154.2     | 7.39 d (J= 1.8<br>Hz, 1H)                         | 154.1     |
| <b>18</b> | 1.05 d (J=6.6 Hz)                                  | 14.8                   | 1.05 d (J= 6.6<br>Hz, 3H) | 15.1      | 1.05 d (J= 6.6<br>Hz, 3H)                         | 15.0      |
| <b>19</b> | 4.30 m                                             | 73.8                   | 4.47 m (1H)               | 74.2      | 4.46 m (1H)                                       | 73.8      |
| <b>20</b> | 1.85 m                                             | 40.8                   | 1.71 m (1H)               | 41.08     | 1.71 m                                            | 41.2      |
| <b>21</b> | 1.8 t (J=10.4 Hz);<br>3.10 dd (J= 10.4;<br>2.0 Hz) | 54.2                   | 3.13 m; 1.8 m<br>(2H)     | 54.4      | 3.12 dd (J=<br>10.0; 2.0 Hz,<br>1H); 1.85 m       | 53.7      |
| <b>22</b> | -                                                  | 167.0                  | -                         | <i>no</i> | -                                                 | 166.6     |
| <b>23</b> | 3.49 s                                             | 50.7                   | 3.48 s                    | 51.0      | 3.49 s                                            | <i>no</i> |
| <b>24</b> | -                                                  | -                      | 2.20 s (3H)               | 17.2      | -                                                 | -         |

*no*- "non-observed"  
\* $^{13}\text{C}$  data based in gHMQC  
The coupling constant in bold is related to **H-F**.

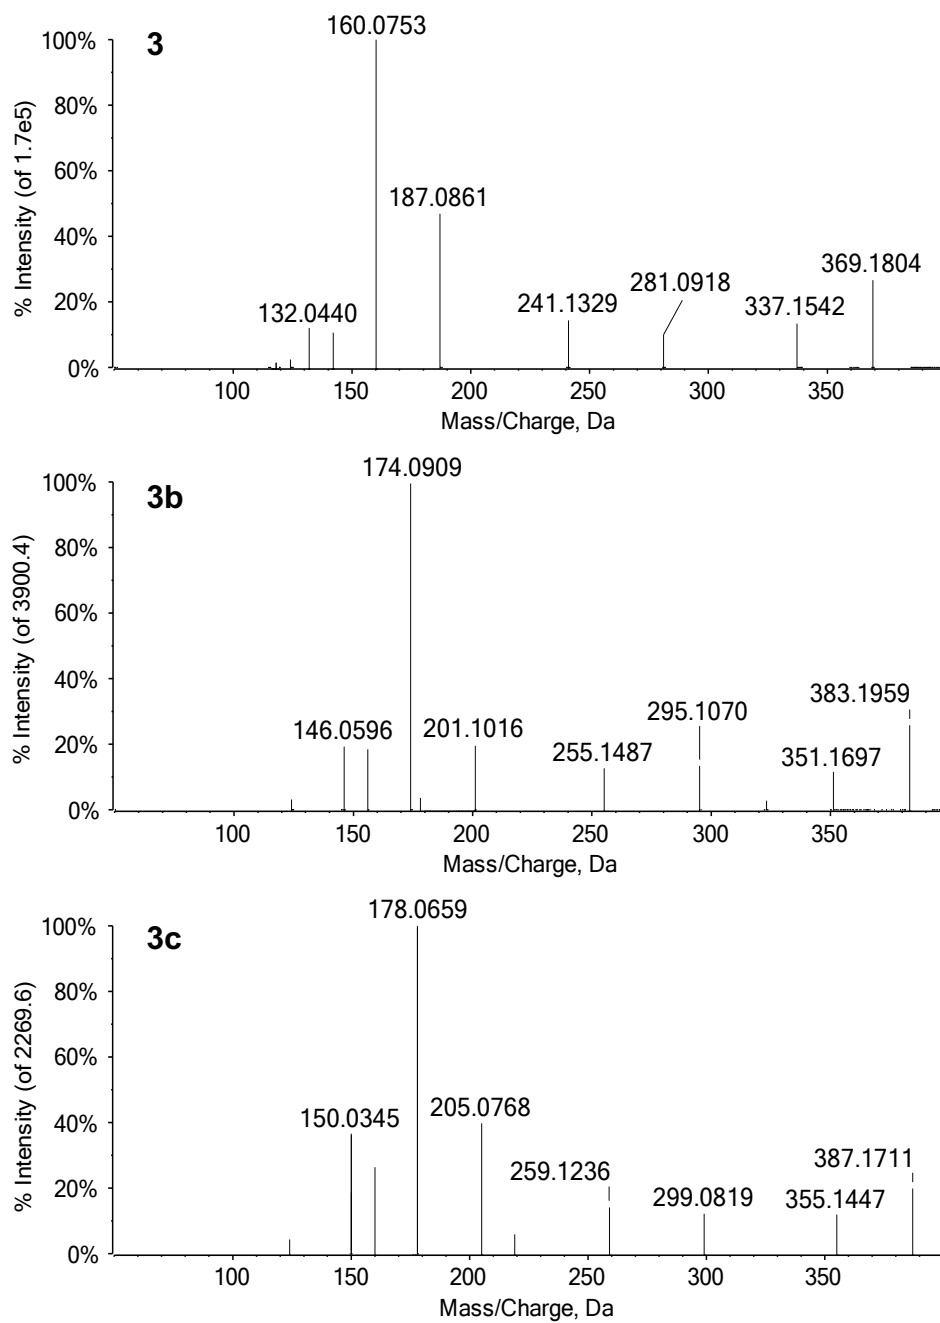

**Figure S37.** ESI-MS/MS spectra of **3**, **3b** and **3c** obtained on an ESI-QTOF.

**Table S3.** ESI-QTOF-MS/MS data of oxindole alkaloids **3**, **3b** and **3c**.

| Observed $m/z$ <sup>a,b</sup> | Calculated $m/z$ | Error (ppm) | Formula of the ion                                                          | Assignment                                           |
|-------------------------------|------------------|-------------|-----------------------------------------------------------------------------|------------------------------------------------------|
| <b>3</b>                      |                  |             |                                                                             |                                                      |
| 369.1804 (25)                 | 369.1809         | +1.4        | C <sub>21</sub> H <sub>25</sub> N <sub>2</sub> O <sub>4</sub> <sup>+</sup>  | <b>A</b>                                             |
| 337.1542 (13)                 | 337.1547         | +1.5        | C <sub>20</sub> H <sub>21</sub> N <sub>2</sub> O <sub>3</sub> <sup>+</sup>  | <b>B (A-CH<sub>3</sub>OH)</b>                        |
| 281.0918 (10)                 | 281.0921         | +1.1        | C <sub>16</sub> H <sub>13</sub> N <sub>2</sub> O <sub>3</sub> <sup>+</sup>  | <b>C (B-C<sub>4</sub>H<sub>8</sub>)</b>              |
| 241.1329 (15)                 | 241.1335         | +2.5        | C <sub>15</sub> H <sub>17</sub> N <sub>2</sub> O <sup>+</sup>               | <b>D (A-C<sub>6</sub>H<sub>8</sub>O<sub>3</sub>)</b> |
| 187.0861 (48)                 | 187.0866         | +2.7        | C <sub>11</sub> H <sub>11</sub> N <sub>2</sub> O <sup>+</sup>               | <b>E (D-C<sub>4</sub>H<sub>6</sub>)</b>              |
| 160.0753 (100)                | 160.0757         | +2.5        | C <sub>10</sub> H <sub>10</sub> NO <sup>+</sup>                             | <b>F (E-HCN)</b>                                     |
| 142.0646 (11)                 | 142.0651         | +3.5        | C <sub>10</sub> H <sub>8</sub> N <sup>+</sup>                               | <b>G (F-H<sub>2</sub>O)</b>                          |
| 132.0440 (13)                 | 132.0444         | +3.0        | C <sub>8</sub> H <sub>6</sub> NO <sup>+</sup>                               | <b>H (E-C<sub>2</sub>H<sub>4</sub>-HCN)</b>          |
| <b>3b</b>                     |                  |             |                                                                             |                                                      |
| 383.1959 (26)                 | 383.1965         | +1.6        | C <sub>22</sub> H <sub>27</sub> N <sub>2</sub> O <sub>4</sub> <sup>+</sup>  | <b>A</b>                                             |
| 351.1697 (11)                 | 351.1703         | +1.7        | C <sub>21</sub> H <sub>23</sub> N <sub>2</sub> O <sub>3</sub> <sup>+</sup>  | <b>B (A-CH<sub>3</sub>OH)</b>                        |
| 295.1070 (14)                 | 295.1077         | +2.4        | C <sub>17</sub> H <sub>15</sub> N <sub>2</sub> O <sub>3</sub> <sup>+</sup>  | <b>C (B-C<sub>4</sub>H<sub>8</sub>)</b>              |
| 255.1487 (13)                 | 255.1492         | +2.0        | C <sub>16</sub> H <sub>19</sub> N <sub>2</sub> O <sup>+</sup>               | <b>D (A-C<sub>6</sub>H<sub>8</sub>O<sub>3</sub>)</b> |
| 201.1016 (20)                 | 201.1022         | +3.0        | C <sub>12</sub> H <sub>13</sub> N <sub>2</sub> O <sup>+</sup>               | <b>E (D-C<sub>4</sub>H<sub>6</sub>)</b>              |
| 174.0909 (100)                | 174.0913         | +2.3        | C <sub>11</sub> H <sub>12</sub> NO <sup>+</sup>                             | <b>F (E-HCN)</b>                                     |
| 156.0803 (18)                 | 156.0808         | +3.2        | C <sub>11</sub> H <sub>10</sub> N <sup>+</sup>                              | <b>G (F-H<sub>2</sub>O)</b>                          |
| 146.0596 (20)                 | 146.0600         | +2.7        | C <sub>9</sub> H <sub>8</sub> NO <sup>+</sup>                               | <b>H (E-C<sub>2</sub>H<sub>4</sub>-HCN)</b>          |
| <b>3c</b>                     |                  |             |                                                                             |                                                      |
| 387.1711 (20)                 | 387.1715         | +1.0        | C <sub>21</sub> H <sub>24</sub> FN <sub>2</sub> O <sub>4</sub> <sup>+</sup> | <b>A</b>                                             |
| 355.1447 (13)                 | 355.1452         | +1.4        | C <sub>20</sub> H <sub>20</sub> FN <sub>2</sub> O <sub>3</sub> <sup>+</sup> | <b>B (A-CH<sub>3</sub>OH)</b>                        |
| 299.0819 (14)                 | 299.0826         | +2.3        | C <sub>16</sub> H <sub>12</sub> FN <sub>2</sub> O <sub>3</sub> <sup>+</sup> | <b>C (B-C<sub>4</sub>H<sub>8</sub>)</b>              |
| 259.1236 (15)                 | 259.1241         | +1.9        | C <sub>15</sub> H <sub>16</sub> FN <sub>2</sub> O <sup>+</sup>              | <b>D (A-C<sub>6</sub>H<sub>8</sub>O<sub>3</sub>)</b> |
| 205.0768 (41)                 | 205.0772         | +2.0        | C <sub>11</sub> H <sub>10</sub> FN <sub>2</sub> O <sup>+</sup>              | <b>E (D-C<sub>4</sub>H<sub>6</sub>)</b>              |
| 178.0659 (100)                | 178.0663         | +2.2        | C <sub>10</sub> H <sub>9</sub> FNO <sup>+</sup>                             | <b>F (E-HCN)</b>                                     |
| 160.0553 (26)                 | 160.0557         | +2.5        | C <sub>10</sub> H <sub>7</sub> FN <sup>+</sup>                              | <b>G (F-H<sub>2</sub>O)</b>                          |
| 150.0345 (38)                 | 150.0350         | +3.3        | C <sub>8</sub> H <sub>5</sub> FNO <sup>+</sup>                              | <b>H (E-C<sub>2</sub>H<sub>4</sub>-HCN)</b>          |

<sup>a</sup>Relative intensities are provided in parentheses.<sup>b</sup>Only ions with relative intensities higher than 5% are reported.

**Table S4.**  $^{13}\text{C}$  NMR data of mitraphylline (**1**) isolated from *U. guianensis* shoots after incorporation of 1- $^{13}\text{C}$ -D-glucose into cultures (DMSO- $d_6$ ).

| C                         | $\delta_c$ | $\delta_c^*$ | Relative intensity of signal |     |                  |
|---------------------------|------------|--------------|------------------------------|-----|------------------|
|                           |            |              | L                            | U   | $\Delta\text{C}$ |
| <b>2</b>                  | 180.5      | 180.9        | 1.5                          | 1.4 | 1.18             |
| <b>3</b>                  | 74.1       | 74.6         | 1.8                          | 2.3 | 0                |
| <b>5</b>                  | 53.3       | 54.3         | 2.1                          | 1.9 | 1.21             |
| <b>6</b>                  | 34.7       | 35.1         | 2.8                          | 1.9 | <b>1.62</b>      |
| <b>7</b>                  | 55.4       | 55.5         | 2.0                          | 2.6 | 0                |
| <b>8</b>                  | 134.0      | 133.3        | 0.9                          | 0.9 | 0                |
| <b>9</b>                  | 123.6      | 123.0        | 2.5                          | 1.3 | <b>2.11</b>      |
| <b>10</b>                 | 122.3      | 122.6        | 1.1                          | 1.3 | 0                |
| <b>11</b>                 | 128.2      | 128.0        | 1.7                          | 1.5 | 1.24             |
| <b>12</b>                 | 109.5      | 109.5        | 1.5                          | 1.8 | 0                |
| <b>13</b>                 | 142.1      | 140.6        | 1.3                          | 0.6 | <b>2.38</b>      |
| <b>14</b>                 | 28.4       | 28.3         | 2.1                          | 1.6 | <b>1.44</b>      |
| <b>15</b>                 | 30.1       | 30.4         | 1.6                          | 2.4 | 0                |
| <b>16</b>                 | 106.9      | 106.9        | 1.0                          | 1.6 | 0                |
| <b>17</b>                 | 154.2      | 154.0        | 2.1                          | 1.6 | <b>1.44</b>      |
| <b>18</b>                 | 15.1       | 14.8         | 5.1                          | 3.4 | <b>1.65</b>      |
| <b>19</b>                 | 73.8       | 73.8         | 1.9                          | 2.4 | 0                |
| <b>20</b>                 | 40.6       | 40.5         | 1.7                          | 2.1 | 0                |
| <b>21</b>                 | 53.8       | 54.3         | 2.0                          | 1.7 | <b>1.30</b>      |
| <b>22</b>                 | 166.7      | 167.1        | 1.5                          | 1.9 | 0                |
| <b>23-OCH<sub>3</sub></b> | 51.1       | 50.7         | 5.3                          | 3.3 | <b>1.77</b>      |

\* literature<sup>1</sup>

U: control experiments with unlabeled precursor; L: labeling experiment with  $^{13}\text{C}$  precursor;  $\Delta\text{C} = 1.1\% \times \text{L}/\text{U}$ : increase in the relative intensity (significant increases in bold for enriched carbons).

**Table S5.**  $^{13}\text{C}$  NMR data of isomitraphylline (**3**) isolated from *U. guianensis* shoots after incorporation of 1- $^{13}\text{C}$ -D-glucose into cultures (DMSO- $d_6$ ).

| C                         | $\delta_c$ | $\delta_c^*$ | Relative intensity of signal |     |             |
|---------------------------|------------|--------------|------------------------------|-----|-------------|
|                           |            |              | L                            | U   | $\Delta C$  |
| <b>2</b>                  | 179.9      | 181.6        | 1.6                          | 1.5 | 1.17        |
| <b>3</b>                  | 71.1       | 71.6         | 2.1                          | 2.2 | 0           |
| <b>5</b>                  | 52.7       | 53.3         | 2.2                          | 1.9 | 1.27        |
| <b>6</b>                  | 34.8       | 35.3         | 3.9                          | 1.9 | <b>2.26</b> |
| <b>7</b>                  | 55.7       | 56.4         | 2.4                          | 2.2 | 1.20        |
| <b>8</b>                  | 133.6      | 133.7        | 0.8                          | 1.2 | 0           |
| <b>9</b>                  | 124.3      | 124.7        | 2.9                          | 1.5 | <b>2.13</b> |
| <b>10</b>                 | 121.5      | 122.2        | 1.4                          | 1.6 | 0           |
| <b>11</b>                 | 127.6      | 127.4        | 1.9                          | 1.5 | 1.39        |
| <b>12</b>                 | 109.3      | 109.6        | 1.9                          | 1.7 | 1.22        |
| <b>13</b>                 | 141.5      | 140.3        | 1.7                          | 1.1 | <b>1.70</b> |
| <b>14</b>                 | 28.7       | 29.1         | 2.6                          | 1.7 | <b>1.68</b> |
| <b>15</b>                 | 29.4       | 29.9         | 2.0                          | 2.1 | 1.05        |
| <b>16</b>                 | 106.7      | 107.2        | 1.2                          | 1.5 | 0           |
| <b>17</b>                 | 153.7      | 153.7        | 2.2                          | 1.5 | <b>1.61</b> |
| <b>18</b>                 | 14.7       | 14.8         | 5.7                          | 3.2 | <b>1.96</b> |
| <b>19</b>                 | 73.3       | 73.8         | 2.4                          | 2.4 | 0           |
| <b>20</b>                 | 40.6       | 40.8         | 2.0                          | 2.2 | 0           |
| <b>21</b>                 | 53.4       | 54.2         | 2.7                          | 1.6 | <b>1.86</b> |
| <b>22</b>                 | 166.1      | 167.0        | 1.5                          | 1.5 | 0           |
| <b>23-OCH<sub>3</sub></b> | 50.7       | 50.7         | 5.4                          | 3.2 | <b>1.86</b> |

\* literature<sup>1</sup>

U: control experiments with unlabeled precursor; L: labeling experiment with  $^{13}\text{C}$  precursor;  $\Delta C = 1.1\% \times L/U$ : increase in the relative intensity (significant increases in bold for enriched carbons).

**Table S6.**  $^{13}\text{C}$  NMR data of isorhynchophylline (**4**) isolated from *U. guianensis* shoots after incorporation of 1- $^{13}\text{C}$ -D-glucose into cultures (DMSO- $d_6$ ).

| C                         | $\delta_c$ | $\delta_c^*$ | Relative intensity of signal |     |            |
|---------------------------|------------|--------------|------------------------------|-----|------------|
|                           |            |              | L                            | U   | $\Delta C$ |
| <b>2</b>                  | 180.2      | 182,4        | 2.5                          | 2.3 | 1.19       |
| <b>3</b>                  | 72.0       | 72.2         | 1.0                          | 1.0 | 0          |
| <b>5</b>                  | 53.5       | 54.2         | 4.5                          | 4.5 | 0          |
| <b>6</b>                  | 34.7       | 36.5         | 2.0                          | 0.9 | <b>2.4</b> |
| <b>7</b>                  | 56.0       | 57.0         | 4.5                          | 6,4 | 0          |
| <b>8</b>                  | 133.8      | 134.2        | 0.9                          | 1.1 | 0          |
| <b>9</b>                  | 124.4      | 125.2        | 5.8                          | 3.9 | <b>1.6</b> |
| <b>10</b>                 | 121.4      | 122.1        | 0.7                          | 0.7 | 0          |
| <b>11</b>                 | 127.4      | 127.1        | 4.0                          | 4.0 | 0          |
| <b>12</b>                 | 109.0      | 109.6        | 3.5                          | 4.2 | 0          |
| <b>13</b>                 | 141.3      | 140.7        | 2.0                          | 2.0 | 0          |
| <b>14</b>                 | 30.0       | 30.1         | 1.1                          | 0.5 | <b>2.4</b> |
| <b>15</b>                 | 37.3       | 38.3         | 1.7                          | 1.7 | 0          |
| <b>16</b>                 | 110.8      | 113.0        | 1.0                          | 1.1 | 0          |
| <b>17</b>                 | 160.2      | 159.5        | 1.0                          | 0.7 | <b>1.6</b> |
| <b>18</b>                 | 11.0       | 11.2         | 2.2                          | 1.5 | <b>1.6</b> |
| <b>19</b>                 | 23.8       | 24.3         | 3.4                          | 4.1 | 0          |
| <b>20</b>                 | 37.3       | 38.3         | 1.7                          | 1.7 | 0          |
| <b>21</b>                 | 57.7       | 58.2         | 1.7                          | 1.1 | <b>1.7</b> |
| <b>22</b>                 | 166.6      | 168.4        | 0,3                          | 0.3 | 0          |
| <b>23-OCH<sub>3</sub></b> | 50.4       | 50.9         | 1.6                          | 0.7 | <b>2.5</b> |
| <b>24-OCH<sub>3</sub></b> | 61.3       | 61.2         | 1.7                          | 0.7 | <b>2.7</b> |

\* literature<sup>1</sup>

U: control experiments with unlabeled precursor; L: labeling experiment with  $^{13}\text{C}$  precursor;  $\Delta C = 1.1\% \times L/U$ : increase in the relative intensity (significant increases in bold for enriched carbons).





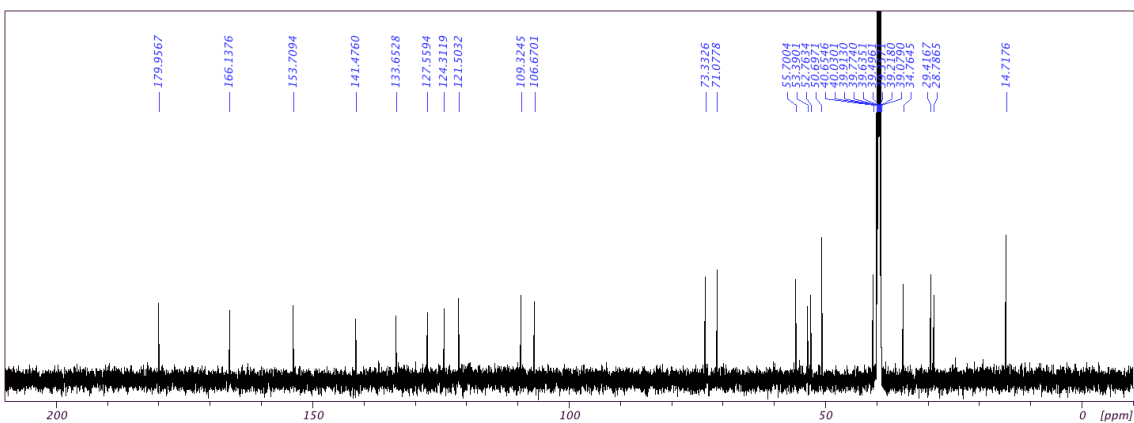

**Figure S41.**  $^{13}\text{C}$  NMR (150 MHz,  $\text{DMSO-d}_6$ ) spectrum of **3** with natural  $^{13}\text{C}$ -isotopic abundance.

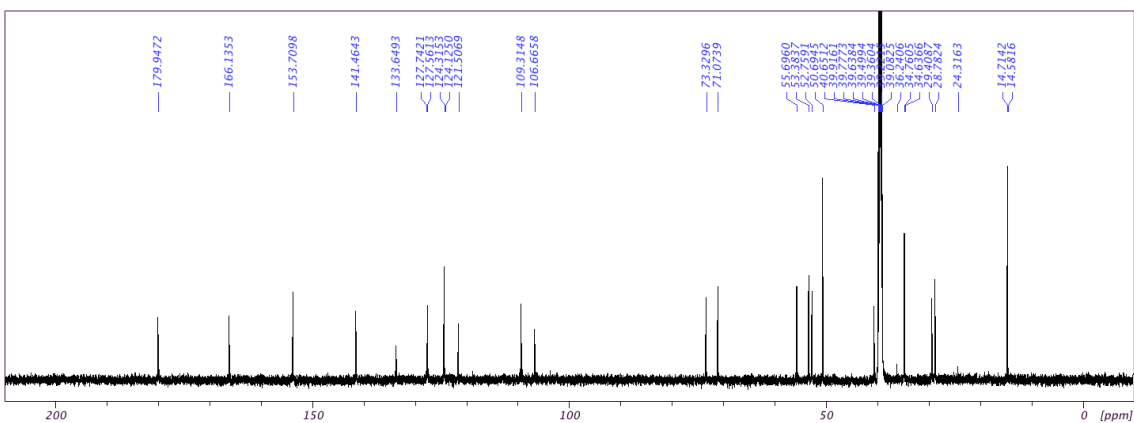

**Figure S42.**  $^{13}\text{C}$  NMR (150 MHz,  $\text{DMSO-d}_6$ ) spectrum of **3** after *U. guianensis* plantlets grew on culture with  $1\text{-}^{13}\text{C}$ -D-glucose.

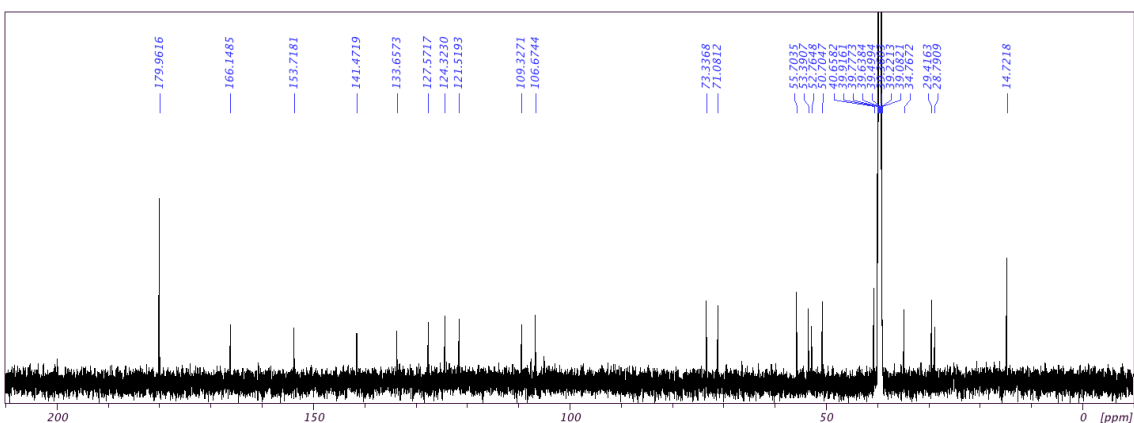

**Figure S43.**  $^{13}\text{C}$  NMR (150 MHz,  $\text{DMSO-d}_6$ ) spectrum of **3** after *U. guianensis* plantlets grew on culture with  $2\text{-}^{13}\text{C}$ -tryptophan.

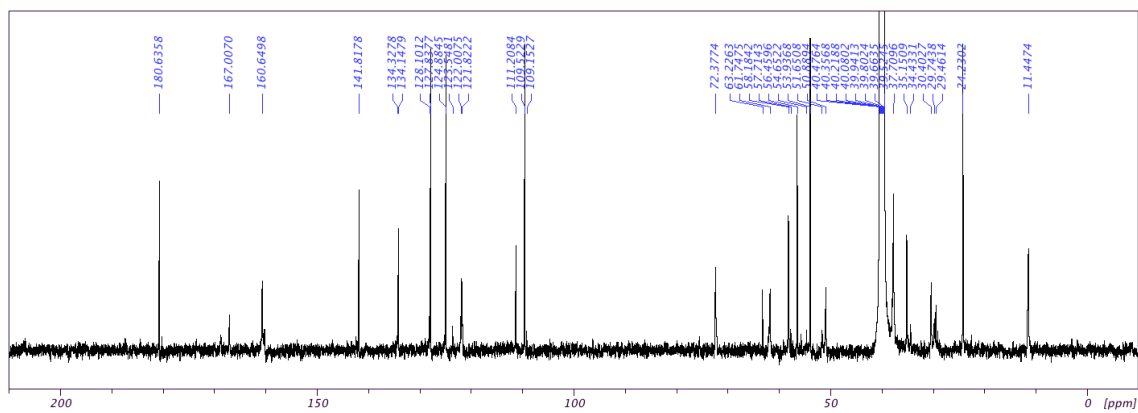

**Figure S44.**  $^{13}\text{C}$  NMR (150 MHz,  $\text{DMSO-d}_6$ ) spectrum of **4** with natural  $^{13}\text{C}$ -isotopic abundance.

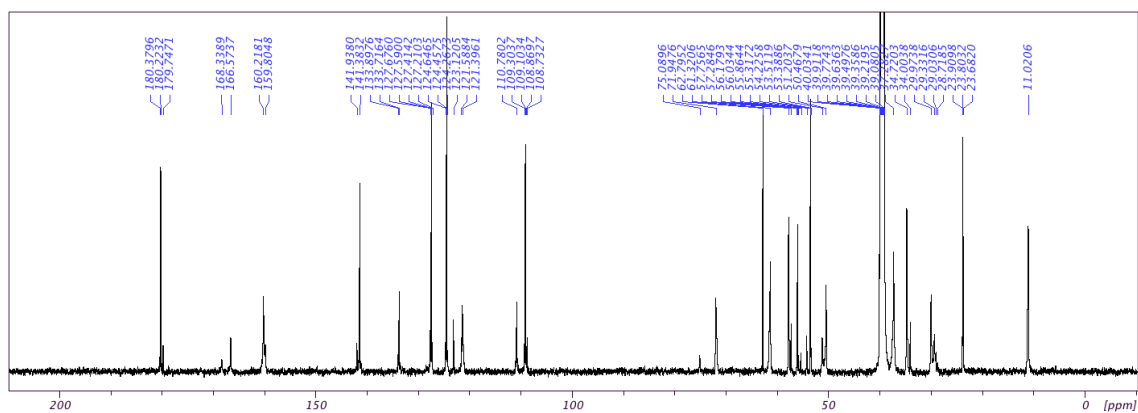

**Figure S45.**  $^{13}\text{C}$  NMR (150 MHz,  $\text{DMSO-d}_6$ ) spectrum of **4** after *U. guianensis* plantlets grew on culture with  $1\text{-}^{13}\text{C}$ -D-glucose.

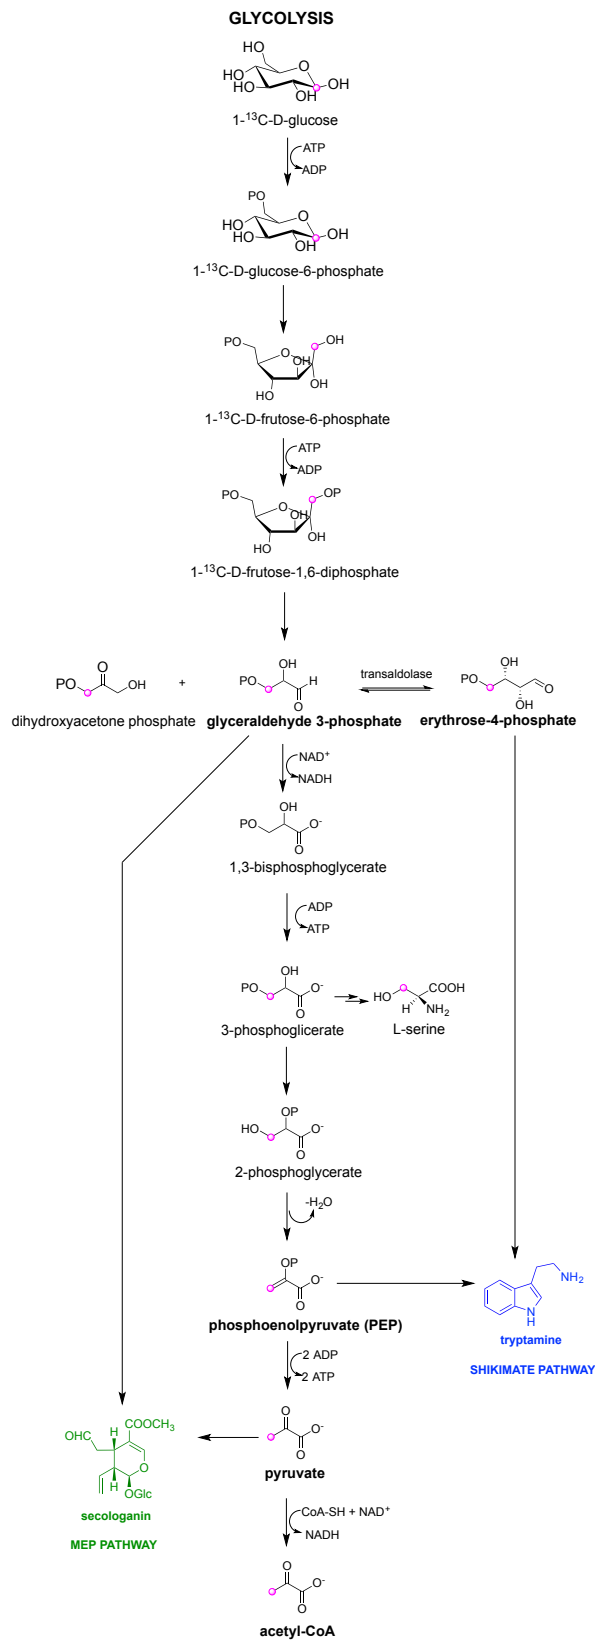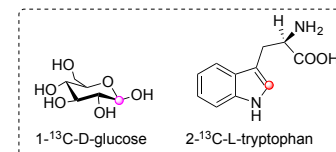

**Figure S46.** Biosynthetic pathway to oxindole alkaloids scaffolds (**1-4**) derived from 1-<sup>13</sup>C-D-glucose and 2-<sup>13</sup>C-tryptophan.

**PENTOSE PHOSPHATE PATHWAY**

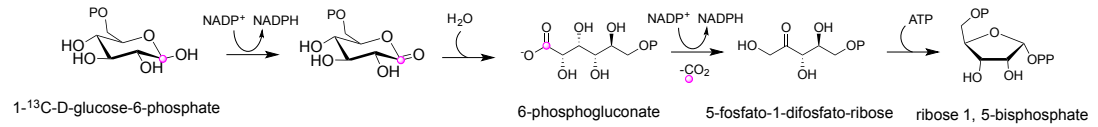

**SHIKIMATE PATHWAY**

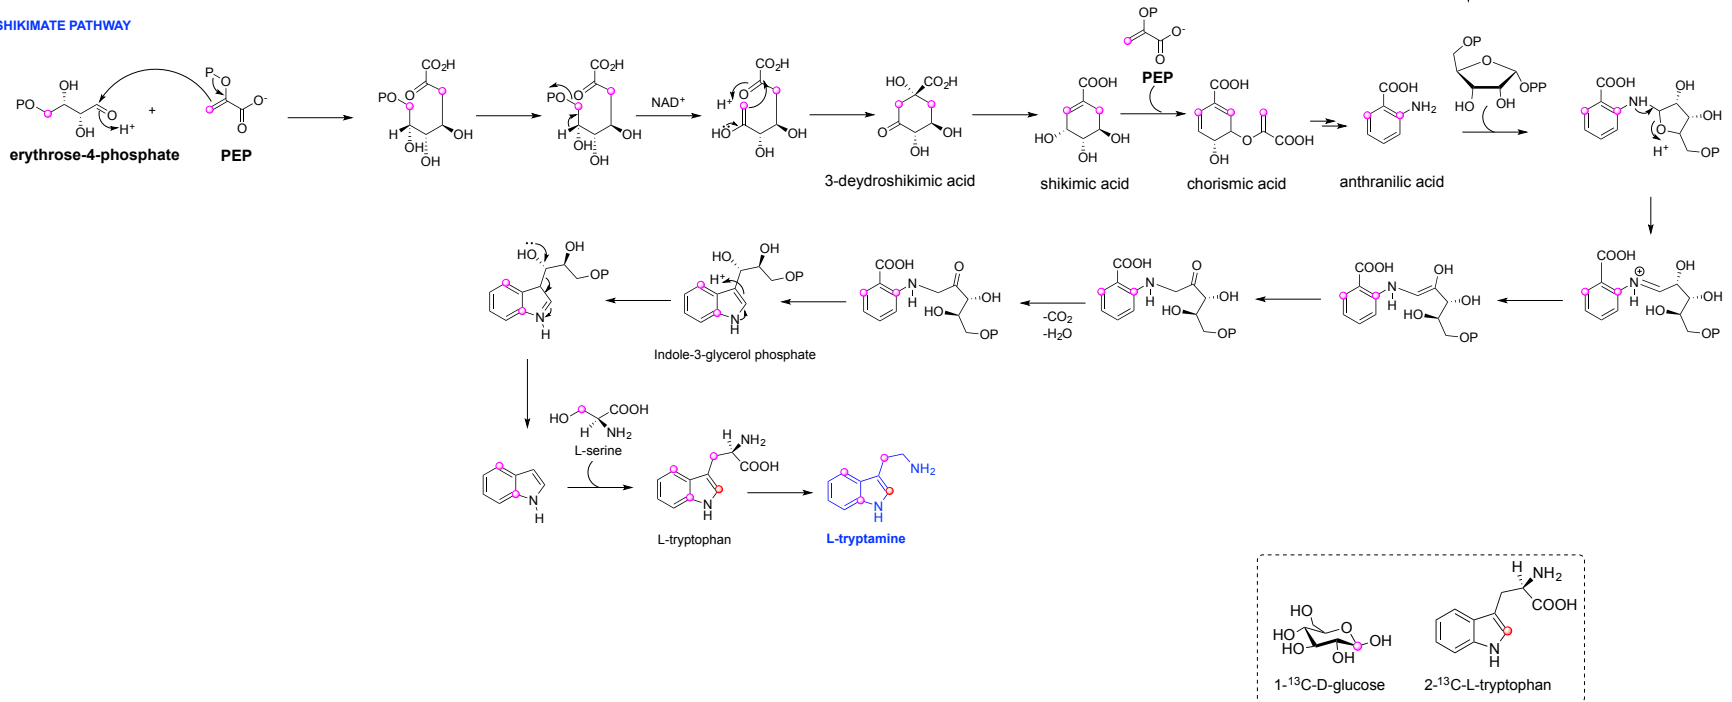

**Figure S46 (continued)**

VIA DOS TERPENOS (MEP)

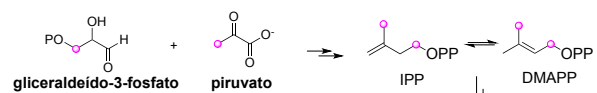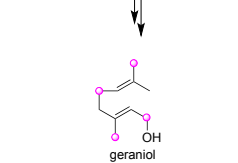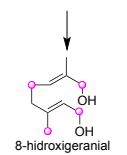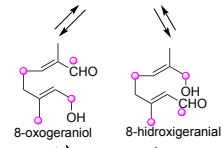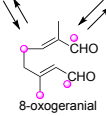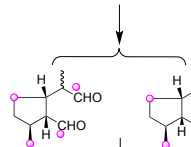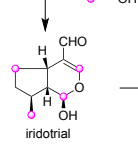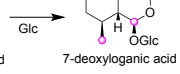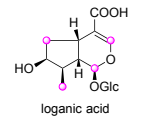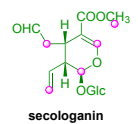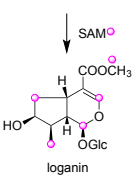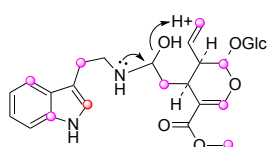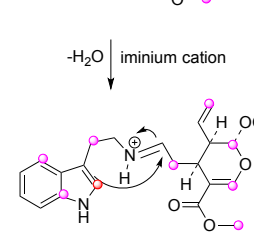

MANNICH REACTION

SHIKIMATE PATHWAY

MEP PATHWAY

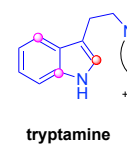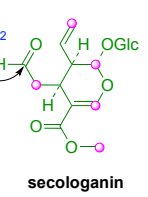

oxindole alkaloids

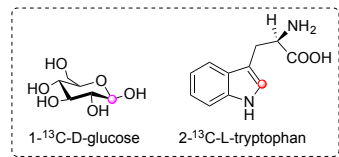

Figure S46 (continued)

## Reference

- 1) a) Toure, H., Babadjamian, A., Balansard, G., Faure, R., Houghtons, P. J. Complete  $^1\text{H}$  and  $^{13}\text{C}$  NMR chemical shift assignments for some pentacyclic oxindole alkaloids. *Spectrosc. Lett.*, **25**, 293-300 (1992); b) Seki, H., Takayama, H., Aimi, N., Sakai, S., Ponglux, D. A nuclear magnetic resonance study on the eleven stereoisomers of heteroyohimbine-type oxindole alkaloid. *Chem. Pharm. Bull.* **41**, 12, 2077-2086 (1993); c) Carbonezi, C. A., Hamrski, L. H., Junior, O. A. F., Furlan, M., Bolzani, V. Da S., Young, M. C. M. Determinação por RMN das configurações relativas e conformações de alcalóides oxindólicos isolados de *Uncaria guianensis*. *Quim. Nova* **27**, 6, 878-881 (2004).
